# Supplementary material for: CFTR Modulator Therapy Enhances Peripheral Blood Monocyte Contributions to Immune Responses in People With Cystic Fibrosis
Source: PubMed Central journal article supplement (PMC7461946; doi:10.3389/fphar.2020.01219), 2020-08-13
Supplement: DataSheet_1.pdf [file DataSheet_1.pdf]

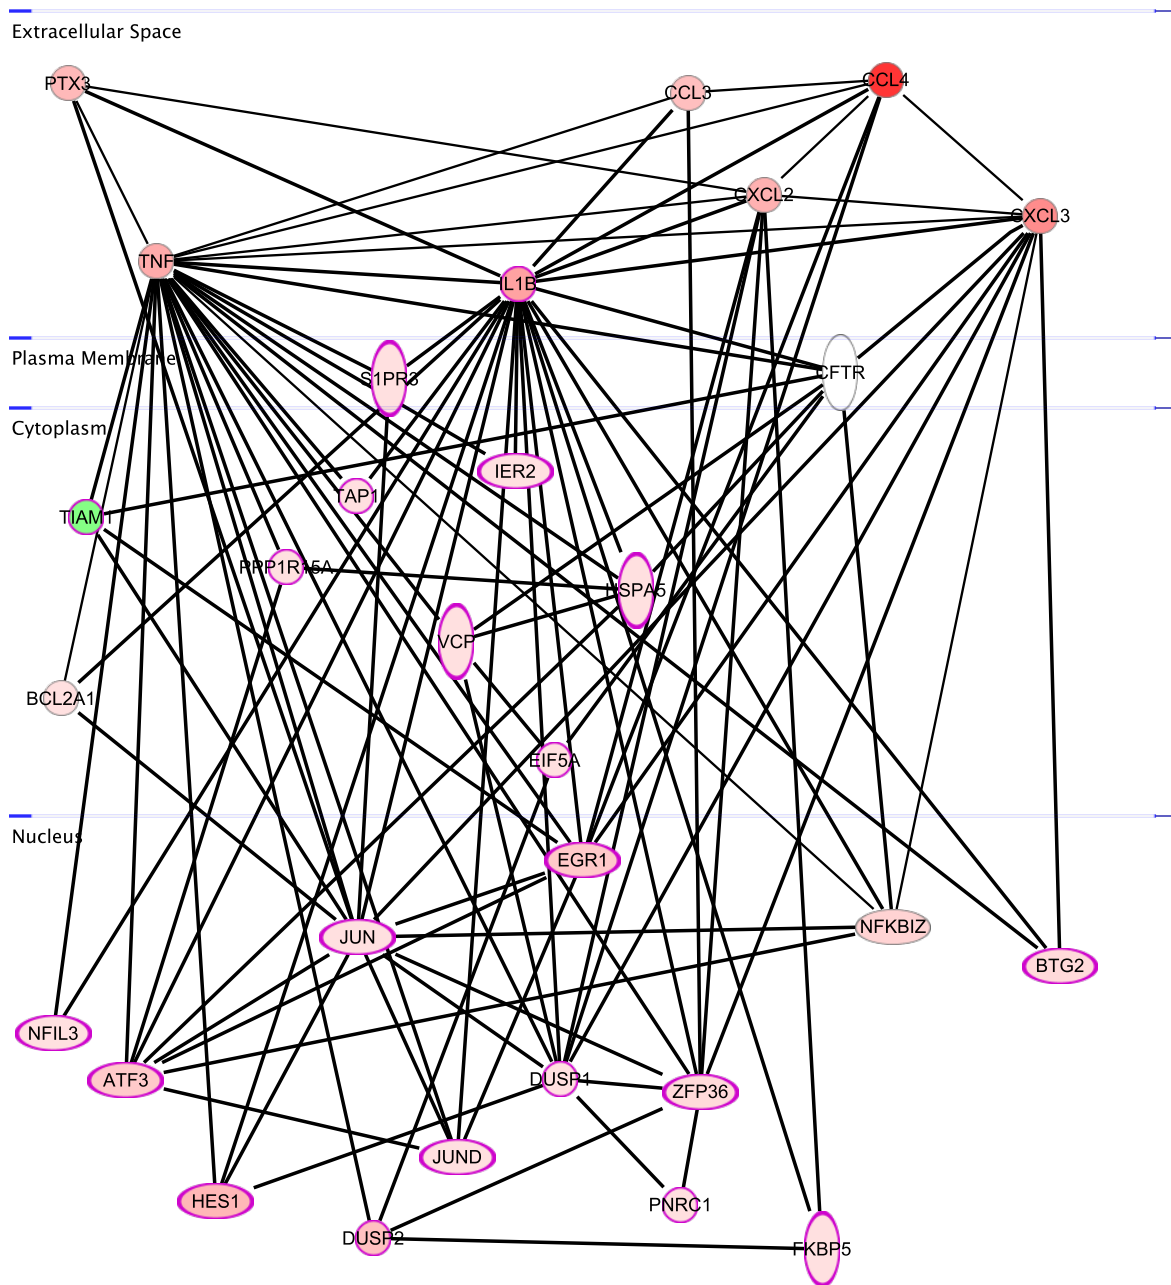

**Figure S1: Gene product interaction network analysis of differentially expressed monocyte genes after 1 week of ivacaftor therapy with all nodes labeled.** This “interactome” was constructed based on known relationships among the differentially expressed genes. To depict interaction of these nodes with the target of ivacaftor, we also added CFTR as a seed to the network. Hubs that are up-regulated depicted as red spheres, and those down regulated depicted. as green spheres.

**Table S1. List of differentially expressed genes (FDR < 0.05) in monocytes of CF subjects before treatment with ivacaftor (D0) and day 7 post ivacaftor (D7)**

| Ensembl_ID      | Gene Symbol | Description                                                                        | Log <sub>2</sub> [D7/D0] | P-value  | FDR      |
|-----------------|-------------|------------------------------------------------------------------------------------|--------------------------|----------|----------|
| ENSG00000165312 | OTUD1       | OTU deubiquitinase 1                                                               | 0.6563                   | 2.77E-17 | 3.74E-13 |
| ENSG00000158050 | DUSP2       | dual specificity phosphatase 2                                                     | 1.0573                   | 1.59E-14 | 1.07E-10 |
| ENSG00000162772 | ATF3        | activating transcription factor 3                                                  | 0.8722                   | 6.91E-14 | 3.11E-10 |
| ENSG00000164691 | TAGAP       | T-cell activation RhoGTPase activating protein                                     | 0.4554                   | 2.05E-11 | 6.93E-08 |
| ENSG00000159388 | BTG2        | BTG family, member 2                                                               | 0.6095                   | 3.51E-10 | 9.47E-07 |
| ENSG00000125538 | IL1B        | interleukin 1, beta                                                                | 1.5618                   | 1.49E-09 | 3.36E-06 |
| ENSG00000232810 | TNF         | tumor necrosis factor                                                              | 1.4257                   | 1.98E-08 | 3.81E-05 |
| ENSG00000146278 | PNRC1       | proline-rich nuclear receptor coactivator 1                                        | 0.5111                   | 7.45E-08 | 1.26E-04 |
| ENSG00000154099 | DNAAF1      | dynein, axonemal, assembly factor 1                                                | 2.6599                   | 1.08E-07 | 1.33E-04 |
| ENSG00000162783 | IER5        | immediate early response 5                                                         | 0.5101                   | 1.00E-07 | 1.33E-04 |
| ENSG00000163734 | CXCL3       | chemokine (C-X-C motif) ligand 3                                                   | 2.1813                   | 8.87E-08 | 1.33E-04 |
| ENSG00000147416 | ATP6V1B2    | ATPase, H+ transporting, lysosomal 56/58kDa, V1 subunit B2                         | 0.2907                   | 1.33E-07 | 1.50E-04 |
| ENSG00000044574 | HSPA5       | heat shock 70kDa protein 5 (glucose-regulated protein, 78kDa)                      | 0.3651                   | 1.94E-07 | 2.02E-04 |
| ENSG00000120738 | EGR1        | early growth response 1                                                            | 0.9069                   | 2.65E-07 | 2.55E-04 |
| ENSG00000163661 | PTX3        | pentraxin 3, long                                                                  | 1.1676                   | 3.54E-07 | 3.19E-04 |
| ENSG00000114315 | HES1        | hes family bHLH transcription factor 1                                             | 1.1437                   | 6.07E-07 | 5.13E-04 |
| ENSG00000177606 | JUN         | jun proto-oncogene                                                                 | 0.4911                   | 7.44E-07 | 5.91E-04 |
| ENSG00000160888 | IER2        | immediate early response 2                                                         | 0.5048                   | 1.45E-06 | 1.09E-03 |
| ENSG00000275302 | CCL4        | chemokine (C-C motif) ligand 4                                                     | 4.0443                   | 4.01E-06 | 2.85E-03 |
| ENSG00000128016 | ZFP36       | ZFP36 ring finger protein                                                          | 0.6332                   | 6.52E-06 | 4.40E-03 |
| ENSG00000129534 | MIS18BP1    | MIS18 binding protein 1                                                            | -0.2422                  | 7.30E-06 | 4.70E-03 |
| ENSG00000277632 | CCL3        | chemokine (C-C motif) ligand 3                                                     | 1.1136                   | 7.82E-06 | 4.80E-03 |
| ENSG00000168394 | TAP1        | transporter 1, ATP-binding cassette, sub-family B (MDR/TAP)                        | 0.3573                   | 9.00E-06 | 5.28E-03 |
| ENSG00000096060 | FKBP5       | FK506 binding protein 5                                                            | 0.4496                   | 1.30E-05 | 7.32E-03 |
| ENSG00000081041 | CXCL2       | chemokine (C-X-C motif) ligand 2                                                   | 1.3774                   | 1.42E-05 | 7.67E-03 |
| ENSG00000120129 | DUSP1       | dual specificity phosphatase 1                                                     | 0.3256                   | 1.95E-05 | 1.01E-02 |
| ENSG00000067208 | EVI5        | ecotropic viral integration site 5                                                 | -0.3220                  | 2.85E-05 | 1.33E-02 |
| ENSG00000087074 | PPP1R15A    | protein phosphatase 1, regulatory subunit 15A                                      | 0.4241                   | 2.76E-05 | 1.33E-02 |
| ENSG00000276070 | CCL4L1      | chemokine (C-C motif) ligand 4-like 1                                              | 3.3671                   | 2.80E-05 | 1.33E-02 |
| ENSG00000169442 | CD52        | CD52 molecule                                                                      | 0.2944                   | 3.48E-05 | 1.57E-02 |
| ENSG00000271614 | LINC00936   | long intergenic non-protein coding RNA 936                                         | 0.4255                   | 4.07E-05 | 1.77E-02 |
| ENSG00000156299 | TIAM1       | T-cell lymphoma invasion and metastasis 1                                          | -0.2215                  | 4.46E-05 | 1.88E-02 |
| ENSG00000130522 | JUND        | jun D proto-oncogene                                                               | 0.4404                   | 4.81E-05 | 1.97E-02 |
| ENSG00000165030 | NFIL3       | nuclear factor, interleukin 3 regulated                                            | 0.5019                   | 5.03E-05 | 2.00E-02 |
| ENSG00000090924 | PLEKHG2     | pleckstrin homology domain containing, family G (with RhoGef domain) member 2      | 0.6430                   | 5.53E-05 | 2.13E-02 |
| ENSG00000178996 | SNX18       | sorting nexin 18                                                                   | -0.2034                  | 6.73E-05 | 2.53E-02 |
| ENSG00000258738 | AL121603.2  | novel transcript, antisense to BAZ1A                                               | 0.8496                   | 8.97E-05 | 3.27E-02 |
| ENSG00000144802 | NFKBIZ      | nuclear factor of kappa light polypeptide gene enhancer in B-cells inhibitor, zeta | 0.7228                   | 9.71E-05 | 3.45E-02 |
| ENSG00000213694 | S1PR3       | sphingosine-1-phosphate receptor 3                                                 | 0.4020                   | 1.23E-04 | 4.26E-02 |
| ENSG00000110917 | MLEC        | malectin                                                                           | 0.2884                   | 1.34E-04 | 4.34E-02 |
| ENSG00000132507 | EIF5A       | eukaryotic translation initiation factor 5A                                        | 0.2424                   | 1.31E-04 | 4.34E-02 |
| ENSG00000180596 | HIST1H2BC   | histone cluster 1, H2bc                                                            | 0.9006                   | 1.35E-04 | 4.34E-02 |
| ENSG00000131174 | COX7B       | cytochrome c oxidase subunit VIIb                                                  | 0.3143                   | 1.43E-04 | 4.48E-02 |
| ENSG00000140379 | BCL2A1      | BCL2-related protein A1                                                            | 0.4717                   | 1.49E-04 | 4.58E-02 |
| ENSG00000165280 | VCP         | valosin containing protein                                                         | 0.2356                   | 1.58E-04 | 4.73E-02 |
| ENSG00000163867 | ZMYM6       | zinc finger, MYM-type 6                                                            | -0.3773                  | 1.62E-04 | 4.76E-02 |
| ENSG00000169508 | GPR183      | G protein-coupled receptor 183                                                     | 0.9544                   | 1.69E-04 | 4.78E-02 |
| ENSG00000273033 | LINC02035   | long intergenic non-protein coding RNA 2035                                        | -0.3506                  | 1.70E-04 | 4.78E-02 |
| ENSG00000163041 | H3F3A       | H3 histone, family 3A                                                              | -0.3813                  | 1.81E-04 | 4.99E-02 |

Table S2. GSEA list of differentially up-regulated processes (FDR < 0.05) in monocytes of CF subjects after treatment with ivacaftor for 7 days.

| Gene Set Name                                                                                                             | Number of Genes | FDR |
|---------------------------------------------------------------------------------------------------------------------------|-----------------|-----|
| HALLMARK_OXIDATIVE_PHOSPHORYLATION                                                                                        | 198             | 0   |
| KEGG_RIBOSOME                                                                                                             | 86              | 0   |
| GO_PROTEIN_LOCALIZATION_TO_ENDOPLASMIC_RETICULUM                                                                          | 118             | 0   |
| REACTOME_METABOLISM_OF_PROTEINS                                                                                           | 394             | 0   |
| KEGG_OXIDATIVE_PHOSPHORYLATION                                                                                            | 102             | 0   |
| GO_ESTABLISHMENT_OF_PROTEIN_LOCALIZATION_TO_ENDOPLASMIC_RETICULUM                                                         | 102             | 0   |
| GO_CYTOSOLIC_RIBOSOME                                                                                                     | 105             | 0   |
| REACTOME_SRP_DEPENDENT_COTRANSLATIONAL_PROTEIN_TARGETING_TO_MEMBRANE                                                      | 119             | 0   |
| REACTOME_INFLUENZA_VIRAL_RNA_TRANSCRIPTION_AND_REPLICATION                                                                | 111             | 0   |
| REACTOME_PEPTIDE_CHAIN_ELONGATION                                                                                         | 95              | 0   |
| GO_TRANSLATIONAL_INITIATION                                                                                               | 141             | 0   |
| REACTOME_METABOLISM_OF_MRNA                                                                                               | 219             | 0   |
| HALLMARK_TNFA_SIGNALING_VIA_NFKB                                                                                          | 193             | 0   |
| REACTOME_NONSENSE_MEDIATED_DECAY_ENHANCED_BY_THE_EXON_JUNCTION_COMPLEX                                                    | 116             | 0   |
| GO_RIBOSOMAL_SUBUNIT                                                                                                      | 156             | 0   |
| REACTOME_TRANSLATION                                                                                                      | 157             | 0   |
| GO_RIBOSOME                                                                                                               | 212             | 0   |
| KEGG_PARKINSONS_DISEASE                                                                                                   | 99              | 0   |
| GO_NUCLEAR_TRANSCRIBED_MRNA_CATABOLIC_PROCESS_NONSENSE_MEDIATED_DECAY                                                     | 117             | 0   |
| REACTOME_3_UTR_MEDIATED_TRANSLATIONAL_REGULATION                                                                          | 116             | 0   |
| GO_CYTOSOLIC_PART                                                                                                         | 197             | 0   |
| REACTOME_TCA_CYCLE_AND_RESPIRATORY_ELECTRON_TRANSPORT                                                                     | 113             | 0   |
| GO_MITOCHONDRIAL_PROTEIN_COMPLEX                                                                                          | 126             | 0   |
| REACTOME_RESPIRATORY_ELECTRON_TRANSPORT_ATP_SYNTHESIS_BY_CHEMIOSMOTIC_COUPLING_AND_HEAT_PRODUCTION_BY_UNCOUPLING_PROTEINS | 78              | 0   |
| GO_STRUCTURAL_CONSTITUENT_OF_RIBOSOME                                                                                     | 194             | 0   |
| GO_NUCLEOSIDE_TRIPHOSPHATE_METABOLIC_PROCESS                                                                              | 193             | 0   |
| GO_INNER_MITOCHONDRIAL_MEMBRANE_PROTEIN_COMPLEX                                                                           | 98              | 0   |
| GO_CELLULAR_RESPONSE_TO_CYTOKINE_STIMULUS                                                                                 | 475             | 0   |
| REACTOME_INFLUENZA_LIFE_CYCLE                                                                                             | 145             | 0   |
| REACTOME_METABOLISM_OF_RNA                                                                                                | 264             | 0   |
| GO_MITOCHONDRIAL_MEMBRANE_PART                                                                                            | 154             | 0   |
| GO_AMIDE_BIOSYNTHETIC_PROCESS                                                                                             | 460             | 0   |
| GO_ESTABLISHMENT_OF_PROTEIN_LOCALIZATION_TO_ORGANELLE                                                                     | 333             | 0   |
| GO_ORGANELLE_INNER_MEMBRANE                                                                                               | 454             | 0   |
| GO_NUCLEOSIDE_MONOPHOSPHATE_METABOLIC_PROCESS                                                                             | 206             | 0   |
| GO_MULTI_ORGANISM_METABOLIC_PROCESS                                                                                       | 136             | 0   |
| GO_PROTEIN_TARGETING_TO_MEMBRANE                                                                                          | 146             | 0   |
| GO_PROTEIN_TARGETING                                                                                                      | 367             | 0   |
| GO_ESTABLISHMENT_OF_PROTEIN_LOCALIZATION_TO_MEMBRANE                                                                      | 243             | 0   |
| GO_CYTOKINE_MEDIATED_SIGNALING_PATHWAY                                                                                    | 351             | 0   |
| KEGG_ALZHEIMERS_DISEASE                                                                                                   | 139             | 0   |
| GO_PROTEIN_LOCALIZATION_TO_ORGANELLE                                                                                      | 497             | 0   |
| GO_GLYCOSYL_COMPOUND_METABOLIC_PROCESS                                                                                    | 310             | 0   |
| GO_CELL_SUBSTRATE_JUNCTION                                                                                                | 352             | 0   |
| GO_NUCLEOBASE_CONTAINING_SMALL_MOLECULE_METABOLIC_PROCESS                                                                 | 441             | 0   |
| REACTOME_RESPIRATORY_ELECTRON_TRANSPORT                                                                                   | 63              | 0   |
| GO_RNA_CATABOLIC_PROCESS                                                                                                  | 214             | 0   |
| HALLMARK_MYC_TARGETS_V1                                                                                                   | 198             | 0   |
| GO_OXIDATIVE_PHOSPHORYLATION                                                                                              | 77              | 0   |
| GO_CYTOSOLIC_LARGE_RIBOSOMAL_SUBUNIT                                                                                      | 57              | 0   |
| HALLMARK_INTERFERON_GAMMA_RESPONSE                                                                                        | 197             | 0   |
| GO_LARGE_RIBOSOMAL_SUBUNIT                                                                                                | 90              | 0   |
| KEGG_HUNTINGTONS_DISEASE                                                                                                  | 154             | 0   |
| GO_VIRAL_LIFE_CYCLE                                                                                                       | 264             | 0   |
| GO_PROTON_TRANSPORTING_TWO_SECTOR_ATPASE_COMPLEX                                                                          | 42              | 0   |
| GO_ORGANIC_CYCLIC_COMPOUND_CATABOLIC_PROCESS                                                                              | 363             | 0   |
| GO_PURINE_CONTAINING_COMPOUND_METABOLIC_PROCESS                                                                           | 320             | 0   |
| GO_GENERATION_OF_PRECURSOR_METABOLITES_AND_ENERGY                                                                         | 241             | 0   |
| GO_HYDROGEN_ION_TRANSMEMBRANE_TRANSPORT                                                                                   | 82              | 0   |
| GO_RRNA_METABOLIC_PROCESS                                                                                                 | 249             | 0   |
| GO_RIBOSOME_BIOGENESIS                                                                                                    | 300             | 0   |
| GO_CELLULAR_RESPIRATION                                                                                                   | 129             | 0   |
| GO_ANTIGEN_PROCESSING_AND_PRESENTATION_OF_PEPTIDE_ANTIGEN                                                                 | 162             | 0   |
| GO_INNATE_IMMUNE_RESPONSE                                                                                                 | 468             | 0   |
| GO_ELECTRON_TRANSPORT_CHAIN                                                                                               | 88              | 0   |

|                                                                                                                |     |   |
|----------------------------------------------------------------------------------------------------------------|-----|---|
| GO_MITOCHONDRIAL_MATRIX                                                                                        | 369 | 0 |
| GO_INFLAMMATORY_RESPONSE                                                                                       | 353 | 0 |
| GO_ANTIGEN_PROCESSING_AND_PRESENTATION_OF_PEPTIDE_ANTIGEN_VIA_MHC_CLASS_I                                      | 88  | 0 |
| GO_ANCHORING_JUNCTION                                                                                          | 418 | 0 |
| REACTOME_ER_PHAGOSOME_PATHWAY                                                                                  | 59  | 0 |
| GO_ANTIGEN_PROCESSING_AND_PRESENTATION                                                                         | 192 | 0 |
| GO_RESPIRATORY_CHAIN                                                                                           | 72  | 0 |
| GO_PROTEIN_LOCALIZATION_TO_MEMBRANE                                                                            | 330 | 0 |
| GO_ENERGY_DERIVATION_BY_OXIDATION_OF_ORGANIC_COMPOUNDS                                                         | 184 | 0 |
| GO_RIBONUCLEOPROTEIN_COMPLEX_BIOGENESIS                                                                        | 420 | 0 |
| GO_MYELIN_SHEATH                                                                                               | 145 | 0 |
| REACTOME_ADAPTIVE_IMMUNE_SYSTEM                                                                                | 480 | 0 |
| GO_HYDROGEN_TRANSPORT                                                                                          | 109 | 0 |
| GO_SMALL_RIBOSOMAL_SUBUNIT                                                                                     | 66  | 0 |
| REACTOME_SIGNALING_BY_WNT                                                                                      | 62  | 0 |
| GO_MITOCHONDRIAL_TRANSMEMBRANE_TRANSPORT                                                                       | 52  | 0 |
| GO_LUMENAL_SIDE_OF_MEMBRANE                                                                                    | 30  | 0 |
| GO_POSITIVE_REGULATION_OF_IMMUNE_RESPONSE                                                                      | 491 | 0 |
| GO_PIGMENT_GRANULE                                                                                             | 93  | 0 |
| GO_RESPONSE_TO_BACTERIUM                                                                                       | 385 | 0 |
| REACTOME_ANTIGEN_PROCESSING_CROSS_PRESENTATION                                                                 | 73  | 0 |
| GO_MITOCHONDRIAL_TRANSPORT                                                                                     | 160 | 0 |
| GO_CYTOSOLIC_SMALL_RIBOSOMAL_SUBUNIT                                                                           | 42  | 0 |
| GO_ANTIGEN_PROCESSING_AND_PRESENTATION_OF_EXOGENOUS_PEPTIDE_ANTIGEN_VIA_MHC_CLASS_I                            | 65  | 0 |
| KEGG_ANTIGEN_PROCESSING_AND_PRESENTATION                                                                       | 64  | 0 |
| GO_STRUCTURAL_MOLECULE_ACTIVITY                                                                                | 474 | 0 |
| HALLMARK_MTORC1_SIGNALING                                                                                      | 197 | 0 |
| GO_NADH_DEHYDROGENASE_COMPLEX                                                                                  | 42  | 0 |
| GO_ACTIVATION_OF_IMMUNE_RESPONSE                                                                               | 376 | 0 |
| GO_PROTON_TRANSPORTING_ATP_SYNTHASE_COMPLEX                                                                    | 22  | 0 |
| REACTOME_FORMATION_OF_THE_TERNARY_COMPLEX_AND_SUBSEQUENTLY_THE_43S_COMPLEX                                     | 55  | 0 |
| GO_CELLULAR_COMPONENT_DISASSEMBLY                                                                              | 430 | 0 |
| GO_RESPONSE_TO_INTERFERON_GAMMA                                                                                | 121 | 0 |
| GO_POSTTRANSCRIPTIONAL_REGULATION_OF_GENE_EXPRESSION                                                           | 394 | 0 |
| GO_POSITIVE_REGULATION_OF_DEFENSE_RESPONSE                                                                     | 310 | 0 |
| REACTOME_SCF5P2_MEDIATED_DEGRADATION_OF_P27_P21                                                                | 53  | 0 |
| GO_IMMUNE_EFFECTOR_PROCESS                                                                                     | 398 | 0 |
| GO_TRANSLATIONAL_ELONGATION                                                                                    | 108 | 0 |
| GO_NEGATIVE_REGULATION_OF_TRANSFERASE_ACTIVITY                                                                 | 286 | 0 |
| HALLMARK_INFLAMMATORY_RESPONSE                                                                                 | 172 | 0 |
| GO_ENDOSOMAL_PART                                                                                              | 377 | 0 |
| GO_DEFENSE_RESPONSE_TO_OTHER_ORGANISM                                                                          | 349 | 0 |
| GO_MITOCHONDRIAL_ATP_SYNTHESIS_COUPLED_PROTON_TRANSPORT                                                        | 17  | 0 |
| GO_OXIDOREDUCTASE_COMPLEX                                                                                      | 86  | 0 |
| REACTOME_ACTIVATION_OF_THE_MRNA_UPON_BINDING_OF_THE_CAP_BINDING_COMPLEX_AND_EIF5_AND_SUBSEQUENT_BINDING_TO_43S | 63  | 0 |
| GO_CELLULAR_RESPONSE_TO_INTERFERON_GAMMA                                                                       | 102 | 0 |
| GO_ACTIVATION_OF_INNATE_IMMUNE_RESPONSE                                                                        | 191 | 0 |
| GO_IMMUNE_RESPONSE_REGULATING_CELL_SURFACE_RECEPTOR_SIGNALING_PATHWAY                                          | 293 | 0 |
| REACTOME_VIF_MEDIATED_DEGRADATION_OF_APOBEC3G                                                                  | 49  | 0 |
| KEGG_PROTEASOME                                                                                                | 43  | 0 |
| REACTOME_CYCLIN_E_ASSOCIATED_EVENTS_DURING_G1_S_TRANSITION                                                     | 62  | 0 |
| HALLMARK_UV_RESPONSE_UP                                                                                        | 142 | 0 |
| HALLMARK_ALLOGRAFT_REJECTION                                                                                   | 185 | 0 |
| REACTOME_AUTODEGRADATION_OF_THE_E3_UBIQUITIN_LIGASE_COP1                                                       | 47  | 0 |
| GO_POSITIVE_REGULATION_OF_INNATE_IMMUNE_RESPONSE                                                               | 229 | 0 |
| GO_PROTEASOME_COMPLEX                                                                                          | 75  | 0 |
| GO_ANTIGEN_BINDING                                                                                             | 86  | 0 |
| HALLMARK_ADIPOGENESIS                                                                                          | 181 | 0 |
| GO_PROTEIN_FOLDING                                                                                             | 194 | 0 |
| GO_REGULATION_OF_INNATE_IMMUNE_RESPONSE                                                                        | 316 | 0 |
| GO_HYDROGEN_EXPORTING_ATPASE_ACTIVITY                                                                          | 24  | 0 |
| GO_RRNA_BINDING                                                                                                | 56  | 0 |
| REACTOME_DESTABILIZATION_OF_MRNA_BY_AUF1_HNRNP_D0                                                              | 50  | 0 |
| REACTOME_FORMATION_OF_ATP_BY_CHEMIOSMOTIC_COUPLING                                                             | 13  | 0 |
| GO_ENDOCYTIC_VESICLE_MEMBRANE                                                                                  | 120 | 0 |
| GO_INTERFERON_GAMMA_MEDIATED_SIGNALING_PATHWAY                                                                 | 66  | 0 |
| GO_MITOCHONDRIAL_RESPIRATORY_CHAIN_COMPLEX_ASSEMBLY                                                            | 63  | 0 |
| REACTOME_P53_DEPENDENT_G1_DNA_DAMAGE_RESPONSE                                                                  | 53  | 0 |

|                                                                                      |     |          |
|--------------------------------------------------------------------------------------|-----|----------|
| HALLMARK_INTERFERON_ALPHA_RESPONSE                                                   | 94  | 0        |
| GO_FC_RECEPTOR_SIGNALING_PATHWAY                                                     | 191 | 0        |
| GO_REGULATION_OF_PROTEIN_MODIFICATION_BY_SMALL_PROTEIN_CONJUGATION_OR_REMOVAL        | 260 | 0        |
| GO_RESPONSE_TO_TOPOLOGICALLY_INCORRECT_PROTEIN                                       | 148 | 0        |
| REACTOME_SCF_BETA_TRCP_MEDIATED_DEGRADATION_OF_EMI1                                  | 49  | 0        |
| REACTOME_CDK_MEDIATED_PHOSPHORYLATION_AND_REMOVAL_OF_CDC6                            | 46  | 0        |
| GO_REGULATION_OF_CYTOKINE_PRODUCTION                                                 | 476 | 0        |
| GO_VESICLE_MEMBRANE                                                                  | 400 | 0        |
| GO_CYTOPLASMIC_VESICLE_PART                                                          | 454 | 0        |
| GO_TRANSPORT_VESICLE                                                                 | 256 | 0        |
| HALLMARK_UNFOLDED_PROTEIN_RESPONSE                                                   | 109 | 0        |
| REACTOME_CLASS_I_MHC_MEDIATED_ANTIGEN_PROCESSING_PRESENTATION                        | 222 | 0        |
| GO_INNATE_IMMUNE_RESPONSE_ACTIVATING_CELL_SURFACE_RECEPTOR_SIGNALING_PATHWAY         | 102 | 0        |
| GO_NCRNA_PROCESSING                                                                  | 369 | 0        |
| REACTOME_REGULATION_OF_ORNITHINE_DECARBOXYLASE_ODC                                   | 48  | 0        |
| GO_UNFOLDED_PROTEIN_BINDING                                                          | 87  | 0        |
| GO_NIK_NF_KAPPAB_SIGNALING                                                           | 79  | 0        |
| GO_MACROMOLECULAR_COMPLEX_DISASSEMBLY                                                | 170 | 0        |
| GO_OXIDOREDUCTASE_ACTIVITY_ACTING_ON_NAD_P_H_QUINONE_OR_SIMILAR_COMPOUND_AS_ACCEPTOR | 49  | 0        |
| REACTOME_ACTIVATION_OF_NF_KAPPAB_IN_B_CELLS                                          | 61  | 0        |
| GO_TUMOR_NECROSIS_FACTOR_MEDIATED_SIGNALING_PATHWAY                                  | 107 | 0        |
| REACTOME_CYTOKINE_SIGNALING_IN_IMMUNE_SYSTEM                                         | 242 | 0        |
| HALLMARK_COMPLEMENT                                                                  | 176 | 0        |
| GO_COATED_VESICLE                                                                    | 202 | 0        |
| REACTOME_P53_INDEPENDENT_G1_S_DNA_DAMAGE_CHECKPOINT                                  | 48  | 0        |
| REACTOME_CROSS_PRESENTATION_OF_SOLUBLE_EXOGENOUS_ANTIGENS_ENDOSOMES                  | 47  | 0        |
| GO_INTRINSIC_COMPONENT_OF_ORGANELLE_MEMBRANE                                         | 230 | 0        |
| GO_AUTOPHAGY                                                                         | 323 | 0        |
| GO_SIDE_OF_MEMBRANE                                                                  | 345 | 0        |
| GO_LYTIC_VACUOLE                                                                     | 442 | 0        |
| GO_TRANSMEMBRANE_RECEPTOR_PROTEIN_TYROSINE_KINASE_SIGNALING_PATHWAY                  | 383 | 0        |
| GO_POSITIVE_REGULATION_OF_PROTEOLYSIS                                                | 328 | 0        |
| REACTOME_METABOLISM_OF_CARBOHYDRATES                                                 | 177 | 0        |
| REACTOME_REGULATION_OF_APOPTOSIS                                                     | 54  | 0        |
| GO_REGULATION_OF_MULTI_ORGANISM_PROCESS                                              | 383 | 0        |
| KEGG_GRAFT_VERSUS_HOST_DISEASE                                                       | 36  | 0        |
| GO_REGULATION_OF_CELLULAR_AMINO_ACID_METABOLIC_PROCESS                               | 57  | 0        |
| GO_POSITIVE_REGULATION_OF_LIGASE_ACTIVITY                                            | 103 | 0        |
| REACTOME_HIV_INFECTION                                                               | 191 | 0        |
| GO_COATED_VESICLE_MEMBRANE                                                           | 119 | 0        |
| GO_ANAPHASE_PROMOTING_COMPLEX_DEPENDENT_CATABOLIC_PROCESS                            | 75  | 0        |
| GO_MITOCHONDRIAL_RESPIRATORY_CHAIN_COMPLEX_I_BIOGENESIS                              | 51  | 0        |
| REACTOME_AUTODEGRADATION_OF_CDH1_BY_CDH1_APC_C                                       | 56  | 0        |
| GO_CELLULAR_PROTEIN_COMPLEX_DISASSEMBLY                                              | 118 | 0        |
| REACTOME_CDT1_ASSOCIATION_WITH_THE_CDC6_ORC_ORIGIN_COMPLEX                           | 54  | 6.35E-06 |
| GO_CELLULAR_PROTEIN_COMPLEX_ASSEMBLY                                                 | 290 | 6.38E-06 |
| GO_OXIDOREDUCTASE_ACTIVITY_ACTING_ON_NAD_P_H                                         | 84  | 6.41E-06 |
| GO_DEFENSE_RESPONSE_TO_BACTERIUM                                                     | 143 | 6.44E-06 |
| GO_CATION_TRANSPORTING_ATPASE_ACTIVITY                                               | 49  | 6.47E-06 |
| REACTOME_PROTEIN_FOLDING                                                             | 46  | 6.50E-06 |
| GO_POSITIVE_REGULATION_OF_PROTEIN_CATABOLIC_PROCESS                                  | 241 | 6.53E-06 |
| KEGG_TYPE_I_DIABETES_MELLITUS                                                        | 36  | 6.56E-06 |
| GO_PROTEIN_TARGETING_TO_MITOCHONDRION                                                | 47  | 6.60E-06 |
| KEGG_PENTOSE_PHOSPHATE_PATHWAY                                                       | 23  | 6.63E-06 |
| KEGG_VIBRIO_CHOLERAE_INFECTION                                                       | 44  | 6.66E-06 |
| GO_RIBOSOME_ASSEMBLY                                                                 | 49  | 6.69E-06 |
| KEGG_PYRIMIDINE_METABOLISM                                                           | 89  | 6.72E-06 |
| GO_RESPONSE_TO_TUMOR_NECROSIS_FACTOR                                                 | 187 | 6.76E-06 |
| REACTOME_APOPTOSIS                                                                   | 134 | 6.79E-06 |
| REACTOME_HOST_INTERACTIONS_OF_HIV_FACTORS                                            | 122 | 6.82E-06 |
| REACTOME_SIGNALING_BY_THE_B_CELL_RECEPTOR_BCR                                        | 121 | 6.86E-06 |
| GO_NEGATIVE_REGULATION_OF_INTRACELLULAR_SIGNAL_TRANSDUCTION                          | 352 | 6.89E-06 |
| GO_PEPTIDE_ANTIGEN_BINDING                                                           | 26  | 6.93E-06 |
| GO_RESPONSE_TO_MOLECULE_OF_BACTERIAL_ORIGIN                                          | 271 | 6.96E-06 |
| GO_REGULATION_OF_IMMUNE_EFFECTOR_PROCESS                                             | 358 | 7.00E-06 |
| GO_REGULATION_OF_PROTEIN_CATABOLIC_PROCESS                                           | 352 | 7.03E-06 |
| REACTOME_MEMBRANE_TRAFFICKING                                                        | 104 | 7.07E-06 |
| REACTOME_APC_C_CDC20_MEDIATED_DEGRADATION_OF_MITOTIC_PROTEINS                        | 65  | 7.11E-06 |

|                                                                                                                   |     |          |
|-------------------------------------------------------------------------------------------------------------------|-----|----------|
| REACTOME_INTERFERON_GAMMA_SIGNALING                                                                               | 59  | 7.14E-06 |
| GO_REGULATION_OF_PROTEIN_UBIQUITINATION_INVOLVED_IN_UBIQUITIN_DEPENDENT_PROTEIN_CATABOLIC_PROCESS                 | 98  | 7.18E-06 |
| GO_REGULATION_OF_PEPTIDASE_ACTIVITY                                                                               | 278 | 7.22E-06 |
| REACTOME_PREFOLDIN_MEDIATED_TRANSFER_OF_SUBSTRATE_TO_CCT_TRIC                                                     | 22  | 7.26E-06 |
| GO_RESPONSE_TO_ENDOPLASMIC_RETICULUM_STRESS                                                                       | 213 | 7.29E-06 |
| GO_LYTIC_VACUOLE_MEMBRANE                                                                                         | 242 | 7.33E-06 |
| GO_REGULATION_OF_SYMBIOSIS_ENCOMPASSING_MUTUALISM_THROUGH_PARASITISM                                              | 179 | 7.37E-06 |
| GO_RESPONSE_TO_PEPTIDE                                                                                            | 293 | 7.41E-06 |
| REACTOME_DOWNSTREAM_SIGNALING_EVENTS_OF_B_CELL_RECEPTOR_BCR                                                       | 92  | 7.45E-06 |
| GO_TRANSLATIONAL_TERMINATION                                                                                      | 92  | 7.49E-06 |
| GO_ATP_HYDROLYSIS_COUPLED_TRANSMEMBRANE_TRANSPORT                                                                 | 29  | 7.53E-06 |
| GO_NEGATIVE_REGULATION_OF_PROTEIN_MODIFICATION_BY_SMALL_PROTEIN_CONJUGATION_OR_REMOVAL                            | 130 | 7.57E-06 |
| GO_REGULATION_OF_APOPTOTIC_SIGNALING_PATHWAY                                                                      | 307 | 7.62E-06 |
| GO_PROTON_TRANSPORTING_TWO_SECTOR_ATPASE_COMPLEX_CATALYTIC_DOMAIN                                                 | 15  | 7.66E-06 |
| GO_RESPONSE_TO_TYPE_I_INTERFERON                                                                                  | 54  | 7.70E-06 |
| GO_MHC_PROTEIN_COMPLEX                                                                                            | 24  | 7.74E-06 |
| REACTOME_GLYCOLYSIS                                                                                               | 23  | 1.23E-05 |
| HALLMARK_APOPTOSIS                                                                                                | 150 | 1.23E-05 |
| KEGG_LEISHMANIA_INFECTION                                                                                         | 68  | 1.24E-05 |
| REACTOME_REGULATION_OF_MRNA_STABILITY_BY_PROTEINS_THAT_BIND_AU_RICH_ELEMENTS                                      | 81  | 1.25E-05 |
| GO_REGULATION_OF_CELLULAR_PROTEIN_LOCALIZATION                                                                    | 468 | 1.25E-05 |
| GO_REGULATION_OF_RNA_STABILITY                                                                                    | 129 | 1.79E-05 |
| REACTOME_INTERFERON_SIGNALING                                                                                     | 140 | 1.80E-05 |
| GO_IRE1_MEDIATED_UNFOLDED_PROTEIN_RESPONSE                                                                        | 55  | 1.80E-05 |
| GO_REGULATION_OF_LIGASE_ACTIVITY                                                                                  | 122 | 1.81E-05 |
| GO_CARBOHYDRATE_BINDING                                                                                           | 199 | 1.82E-05 |
| KEGG_ALLOGRAFT_REJECTION                                                                                          | 31  | 1.83E-05 |
| GO_PROTEASOMAL_PROTEIN_CATABOLIC_PROCESS                                                                          | 258 | 2.34E-05 |
| GO_CARBOHYDRATE_METABOLIC_PROCESS                                                                                 | 487 | 2.35E-05 |
| GO_POSITIVE_REGULATION_OF_ESTABLISHMENT_OF_PROTEIN_LOCALIZATION                                                   | 406 | 2.36E-05 |
| GO_PROTEIN_MATURATION                                                                                             | 216 | 2.37E-05 |
| REACTOME_ANTIGEN_PRESENTATION_FOLDING_ASSEMBLY_AND_PEPTIDE_LOADING_OF_CLASS_I_MHC                                 | 21  | 2.38E-05 |
| GO_REGULATION_OF_MAPK_CASCADE                                                                                     | 485 | 2.92E-05 |
| GO_GLYCOSYL_COMPOUND_BIOSYNTHETIC_PROCESS                                                                         | 105 | 3.31E-05 |
| GO_NON_CANONICAL_WNT_SIGNALING_PATHWAY                                                                            | 116 | 3.32E-05 |
| REACTOME_APC_C_CDH1_MEDIATED_DEGRADATION_OF_CDC20_AND_OTHER_APC_C_CDH1_TARGETED_PROTEINS_IN_LATE_MITOSIS_EARLY_G1 | 64  | 3.34E-05 |
| REACTOME_FORMATION_OF_TUBULIN_FOLDING_INTERMEDIATES_BY_CCT_TRIC                                                   | 16  | 3.35E-05 |
| GO_RESPONSE_TO_OXIDATIVE_STRESS                                                                                   | 299 | 3.36E-05 |
| REACTOME_G1_S_TRANSITION                                                                                          | 104 | 3.38E-05 |
| GO_MITOCHONDRIAL_ELECTRON_TRANSPORT_CYTOCHROME_C_TO_OXYGEN                                                        | 14  | 3.39E-05 |
| GO_RESPONSE_TO_INTERLEUKIN_1                                                                                      | 87  | 3.41E-05 |
| GO_CELLULAR_HOMEOSTASIS                                                                                           | 490 | 3.42E-05 |
| HALLMARK_P53_PATHWAY                                                                                              | 186 | 3.43E-05 |
| GO_ANTIGEN_RECEPTOR_MEDIATED_SIGNALING_PATHWAY                                                                    | 178 | 3.45E-05 |
| GO_NUCLEOSIDE_TRIPHOSPHATE_BIOSYNTHETIC_PROCESS                                                                   | 53  | 3.46E-05 |
| GO_ENDOCYTOSIS                                                                                                    | 418 | 3.48E-05 |
| BIOCARTA_GLYCOLYSIS_PATHWAY                                                                                       | 8   | 3.49E-05 |
| GO_REGULATION_OF_ESTABLISHMENT_OF_PLANAR_POLARITY                                                                 | 97  | 3.51E-05 |
| REACTOME_UNFOLDED_PROTEIN_RESPONSE                                                                                | 74  | 3.80E-05 |
| BIOCARTA_ERK_PATHWAY                                                                                              | 24  | 3.82E-05 |
| GO_ENERGY_COUPLED_PROTON_TRANSPORT_DOWN_ELECTROCHEMICAL_GRADIENT                                                  | 22  | 3.83E-05 |
| GO_ER_TO_GOLGI_TRANSPORT_VESICLE                                                                                  | 64  | 3.85E-05 |
| REACTOME_ACTIVATION_OF_CHAPERONE_GENES_BY_XBP1S                                                                   | 44  | 4.19E-05 |
| GO_REGULATION_OF_CELL_ACTIVATION                                                                                  | 407 | 4.21E-05 |
| GO_GTPASE_ACTIVITY                                                                                                | 209 | 4.22E-05 |
| GO_ER_TO_GOLGI_TRANSPORT_VESICLE_MEMBRANE                                                                         | 50  | 4.24E-05 |
| REACTOME_INTERFERON_ALPHA_BETA_SIGNALING                                                                          | 50  | 4.26E-05 |
| GO_RESPONSE_TO_HYDROGEN_PEROXIDE                                                                                  | 98  | 4.27E-05 |
| GO_RIBONUCLEOSIDE_TRIPHOSPHATE_BIOSYNTHETIC_PROCESS                                                               | 41  | 4.29E-05 |
| GO_AMIDE_BINDING                                                                                                  | 202 | 4.31E-05 |
| GO_POSITIVE_REGULATION_OF_ORGANELLE_ORGANIZATION                                                                  | 486 | 4.32E-05 |
| GO_EARLY_ENDOSOME                                                                                                 | 253 | 4.66E-05 |
| GO_ISOMERASE_ACTIVITY                                                                                             | 138 | 4.68E-05 |
| GO_IRON_ION_TRANSPORT                                                                                             | 44  | 4.70E-05 |
| GO_ATP_BIOSYNTHETIC_PROCESS                                                                                       | 30  | 6.11E-05 |
| GO_PROTON_TRANSPORTING_TWO_SECTOR_ATPASE_COMPLEX_PROTON_TRANSPORTING_DOMAIN                                       | 19  | 6.13E-05 |
| REACTOME_ORC1_REMOVAL_FROM_CHROMATIN                                                                              | 65  | 6.15E-05 |
| GO_POSITIVE_REGULATION_OF_CELL_ACTIVATION                                                                         | 264 | 6.18E-05 |

|                                                                                        |     |          |
|----------------------------------------------------------------------------------------|-----|----------|
| GO_PROTON_TRANSPORTING_ATP_SYNTHASE_COMPLEX_COUPLING_FACTOR_F_O_                       | 11  | 6.20E-05 |
| GO_T_CELL_RECEPTOR_SIGNALING_PATHWAY                                                   | 137 | 7.03E-05 |
| HALLMARK_IL2_STATS_SIGNALING                                                           | 184 | 7.05E-05 |
| HALLMARK_FATTY_ACID_METABOLISM                                                         | 137 | 7.08E-05 |
| GO_RESPONSE_TO_REACTIVE_OXYGEN_SPECIES                                                 | 161 | 7.11E-05 |
| GO_POSITIVE_REGULATION_OF_PROTEIN_MODIFICATION_BY_SMALL_PROTEIN_CONJUGATION_OR_REMOVAL | 181 | 7.36E-05 |
| GO_COFACTOR_METABOLIC_PROCESS                                                          | 283 | 7.39E-05 |
| REACTOME_REGULATION_OF_MITOTIC_CELL_CYCLE                                              | 77  | 7.42E-05 |
| GO_LEUKOCYTE_MEDIATED_IMMUNITY                                                         | 150 | 7.44E-05 |
| GO_RESPONSE_TO_TOXIC_SUBSTANCE                                                         | 188 | 7.47E-05 |
| REACTOME_INSULIN_RECEPTOR_RECYCLING                                                    | 17  | 7.50E-05 |
| PID_P38_MK2_PATHWAY                                                                    | 20  | 8.20E-05 |
| REACTOME_MHC_CLASS_II_ANTIGEN_PRESENTATION                                             | 80  | 8.23E-05 |
| REACTOME_ASSEMBLY_OF_THE_PRE_REPLICATIVE_COMPLEX                                       | 63  | 8.26E-05 |
| GO_REGULATION_OF_PROTEIN_BINDING                                                       | 147 | 8.29E-05 |
| REACTOME_POST_TRANSLATIONAL_PROTEIN_MODIFICATION                                       | 145 | 8.32E-05 |
| GO_POSITIVE_REGULATION_OF_CATABOLIC_PROCESS                                            | 352 | 8.65E-05 |
| REACTOME_SYNTHESIS_OF_DNA                                                              | 89  | 9.58E-05 |
| GO_PURINE_NUCLEOSIDE_BIOSYNTHETIC_PROCESS                                              | 78  | 1.05E-04 |
| GO_POSITIVE_REGULATION_OF_CANONICAL_WNT_SIGNALING_PATHWAY                              | 97  | 1.09E-04 |
| REACTOME_METABOLISM_OF_NUCLEOTIDES                                                     | 63  | 1.10E-04 |
| GO_POSITIVE_REGULATION_OF_CYTOKINE_PRODUCTION                                          | 313 | 1.11E-04 |
| GO_REGULATION_OF_ORGAN_MORPHOGENESIS                                                   | 169 | 1.12E-04 |
| GO_LATE_ENDOSOME_MEMBRANE                                                              | 90  | 1.12E-04 |
| GO_CARBOHYDRATE_BIOSYNTHETIC_PROCESS                                                   | 96  | 1.12E-04 |
| GO_NUCLEOSIDE_PHOSPHATE_BIOSYNTHETIC_PROCESS                                           | 153 | 1.13E-04 |
| GO_PHAGOSOME_MATURATION                                                                | 30  | 1.13E-04 |
| GO_ORGANELLAR_RIBOSOME                                                                 | 68  | 1.14E-04 |
| GO_REGULATION_OF_CELLULAR_AMINE_METABOLIC_PROCESS                                      | 72  | 1.15E-04 |
| GO_PHAGOSOME_ACIDIFICATION                                                             | 21  | 1.18E-04 |
| GO_CELLULAR_RESPONSE_TO_INSULIN_STIMULUS                                               | 114 | 1.18E-04 |
| GO_TRIVALENT_INORGANIC_CATION_TRANSPORT                                                | 30  | 1.19E-04 |
| GO_ORGANONITROGEN_COMPOUND_CATABOLIC_PROCESS                                           | 258 | 1.19E-04 |
| GO_REGULATION_OF_RESPONSE_TO_WOUNDING                                                  | 304 | 1.20E-04 |
| GO_CELL_ACTIVATION                                                                     | 473 | 1.45E-04 |
| REACTOME_S_PHASE                                                                       | 105 | 1.49E-04 |
| KEGG_LYSOSOME                                                                          | 114 | 1.57E-04 |
| GO_CELLULAR_RESPONSE_TO_TOPOLOGICALLY_INCORRECT_PROTEIN                                | 111 | 1.57E-04 |
| GO_MIDBRAIN_DEVELOPMENT                                                                | 62  | 1.65E-04 |
| BIOCARTA_MPR_PATHWAY                                                                   | 27  | 1.69E-04 |
| GO_CELLULAR_RESPONSE_TO_NITROGEN_COMPOUND                                              | 366 | 1.73E-04 |
| GO_TRANSITION_METAL_ION_TRANSPORT                                                      | 82  | 1.73E-04 |
| REACTOME_M_G1_TRANSITION                                                               | 76  | 1.80E-04 |
| GO_CYTOCHROME_COMPLEX                                                                  | 15  | 1.81E-04 |
| GO_CARBOHYDRATE_DERIVATIVE_BIOSYNTHETIC_PROCESS                                        | 455 | 1.84E-04 |
| GO_LATE_ENDOSOME                                                                       | 186 | 2.00E-04 |
| REACTOME_GLUCOSE_METABOLISM                                                            | 56  | 2.01E-04 |
| GO_RESPONSE_TO_INSULIN                                                                 | 157 | 2.13E-04 |
| GO_ENDOPLASMIC_RETICULUM_LUMEN                                                         | 141 | 2.16E-04 |
| GO_PURINE_NUCLEOSIDE_MONOPHOSPHATE_BIOSYNTHETIC_PROCESS                                | 55  | 2.17E-04 |
| GO_POSITIVE_REGULATION_OF_LOCOMOTION                                                   | 319 | 2.19E-04 |
| GO_OXIDOREDUCTION_COENZYME_METABOLIC_PROCESS                                           | 87  | 2.20E-04 |
| GO_NEGATIVE_REGULATION_OF_CANONICAL_WNT_SIGNALING_PATHWAY                              | 127 | 2.27E-04 |
| GO_GLYCERALDEHYDE_3_PHOSPHATE_METABOLIC_PROCESS                                        | 16  | 2.30E-04 |
| GO_PHAGOCYTOSIS                                                                        | 163 | 2.30E-04 |
| HALLMARK_DNA_REPAIR                                                                    | 141 | 2.54E-04 |
| GO_NEGATIVE_REGULATION_OF_IMMUNE_RESPONSE                                              | 97  | 2.55E-04 |
| GO_REGULATION_OF_CELLULAR_AMIDE_METABOLIC_PROCESS                                      | 303 | 2.56E-04 |
| GO_OXIDOREDUCTASE_ACTIVITY_ACTING_ON_PEROXIDE_AS_ACCEPTOR                              | 32  | 2.57E-04 |
| GO_PROTON_TRANSPORTING_V_TYPE_ATPASE_COMPLEX                                           | 18  | 2.58E-04 |
| GO_MHC_PROTEIN_COMPLEX_BINDING                                                         | 17  | 2.67E-04 |
| KEGG_AUTOIMMUNE_THYROID_DISEASE                                                        | 30  | 2.71E-04 |
| GO_NUCLEOSIDE_MONOPHOSPHATE_BIOSYNTHETIC_PROCESS                                       | 73  | 2.78E-04 |
| GO_PROTEIN_LOCALIZATION_TO_MITOCHONDRION                                               | 65  | 2.85E-04 |
| GO_PROTEIN_OLIGOMERIZATION                                                             | 331 | 2.93E-04 |
| GO_GLYCOSPHINGOLIPID_METABOLIC_PROCESS                                                 | 51  | 3.04E-04 |
| SA_TRKA_RECEPTOR                                                                       | 15  | 3.07E-04 |
| GO_FC_EPSILON_RECEPTOR_SIGNALING_PATHWAY                                               | 130 | 3.39E-04 |

|                                                                                              |     |          |
|----------------------------------------------------------------------------------------------|-----|----------|
| GO_REGULATION_OF_CELLULAR_PROTEIN_CATABOLIC_PROCESS                                          | 251 | 3.42E-04 |
| GO_INTRINSIC_COMPONENT_OF_ENDOPLASMIC_RETICULUM_MEMBRANE                                     | 114 | 3.57E-04 |
| GO_ELECTRON_CARRIER_ACTIVITY                                                                 | 98  | 3.67E-04 |
| GO_METHYLOSOME                                                                               | 12  | 3.68E-04 |
| GO_MHC_CLASS_I_PROTEIN_COMPLEX                                                               | 10  | 3.82E-04 |
| REACTOME_MRNA_SPLICING_MINOR_PATHWAY                                                         | 41  | 4.16E-04 |
| GO_ORGANELLE_SUBCOMPARTMENT                                                                  | 271 | 4.18E-04 |
| GO_RESPONSE_TO_FIBROBLAST_GROWTH_FACTOR                                                      | 75  | 4.27E-04 |
| GO_RESPONSE_TO_WOUNDING                                                                      | 414 | 4.38E-04 |
| PID_MYC_ACTIV_PATHWAY                                                                        | 75  | 4.61E-04 |
| GO_NEGATIVE_REGULATION_OF_CYTOKINE_PRODUCTION                                                | 176 | 4.63E-04 |
| GO_REGULATION_OF_ACTIN_CYTOSKELETON_REORGANIZATION                                           | 25  | 4.76E-04 |
| KEGG_GLYCOLYSIS_GLUconeogenesis                                                              | 40  | 4.78E-04 |
| GO_PROTEASOME_ACCESSORY_COMPLEX                                                              | 24  | 4.79E-04 |
| HALLMARK_HYPOXIA                                                                             | 161 | 4.86E-04 |
| PID_AP1_PATHWAY                                                                              | 55  | 4.88E-04 |
| REACTOME_MITOTIC_G1_G1_S_PHASES                                                              | 129 | 4.92E-04 |
| GO_POSITIVE_REGULATION_OF_CELLULAR_PROTEIN_CATABOLIC_PROCESS                                 | 178 | 4.93E-04 |
| GO_POSITIVE_REGULATION_OF_CELLULAR_PROTEIN_LOCALIZATION                                      | 301 | 4.93E-04 |
| GO_SMALL_MOLECULE_BIOSYNTHETIC_PROCESS                                                       | 353 | 4.94E-04 |
| GO_MONOCARBOXYLIC_ACID_METABOLIC_PROCESS                                                     | 368 | 4.95E-04 |
| GO_POSITIVE_REGULATION_OF_MAPK_CASCADE                                                       | 340 | 5.26E-04 |
| BIOCARTA_PROTEASOME_PATHWAY                                                                  | 28  | 5.31E-04 |
| GO_NEGATIVE_REGULATION_OF_APOPTOTIC_SIGNALING_PATHWAY                                        | 162 | 5.33E-04 |
| GO_G_PROTEIN_ALPHA_SUBUNIT_BINDING                                                           | 17  | 5.87E-04 |
| GO_OXIDOREDUCTASE_ACTIVITY_ACTING_ON_A_HEME_GROUP_OF_DONORS                                  | 20  | 6.16E-04 |
| GO_POSITIVE_REGULATION_OF_APOPTOTIC_SIGNALING_PATHWAY                                        | 155 | 6.24E-04 |
| GO_POSITIVE_REGULATION_OF_PEPTIDASE_ACTIVITY                                                 | 135 | 6.25E-04 |
| REACTOME_MITOCHONDRIAL_PROTEIN_IMPORT                                                        | 49  | 6.52E-04 |
| GO_REGULATION_OF_BINDING                                                                     | 240 | 6.65E-04 |
| GO_REGULATION_OF_CYSTEINE_TYPE_ENDOPEPTIDASE_ACTIVITY                                        | 186 | 6.86E-04 |
| HALLMARK_IL6_JAK_STAT3_SIGNALING                                                             | 78  | 6.88E-04 |
| KEGG_CARDIAC_MUSCLE_CONTRACTION                                                              | 49  | 7.40E-04 |
| GO_PURINE_CONTAINING_COMPOUND_BIOSYNTHETIC_PROCESS                                           | 113 | 7.42E-04 |
| GO_GUANYL_NUCLEOTIDE_BINDING                                                                 | 315 | 7.90E-04 |
| REACTOME_DIABETES_PATHWAYS                                                                   | 109 | 8.28E-04 |
| REACTOME_ASPARAGINE_N_LINKED_GLYCOSYLATION                                                   | 75  | 8.37E-04 |
| BIOCARTA_SALMONELLA_PATHWAY                                                                  | 13  | 8.39E-04 |
| GO_CYTOPLASMIC_TRANSLATION                                                                   | 41  | 8.99E-04 |
| GO_ANTIGEN_PROCESSING_AND_PRESENTATION_OF_ENDOGENOUS_ANTIGEN                                 | 16  | 9.00E-04 |
| GO_PENTOSE_PHOSPHATE_SHUNT                                                                   | 12  | 9.05E-04 |
| GO_MONOSACCHARIDE_METABOLIC_PROCESS                                                          | 144 | 9.11E-04 |
| KEGG_PURINE_METABOLISM                                                                       | 131 | 9.13E-04 |
| GO_REGULATION_OF_PROTEIN_SECRETION                                                           | 289 | 9.52E-04 |
| GO_ANTIGEN_PROCESSING_AND_PRESENTATION_OF_PEPTIDE_OR_POLYSACCHARIDE_ANTIGEN_VIA_MHC_CLASS_II | 83  | 9.64E-04 |
| KEGG_PRION_DISEASES                                                                          | 31  | 9.65E-04 |
| KEGG_EPITHELIAL_CELL_SIGNALING_IN_HELICOBACTER_PYLORI_INFECTION                              | 56  | 9.80E-04 |
| GO_POSITIVE_REGULATION_OF_INTRACELLULAR_TRANSPORT                                            | 301 | 1.00E-03 |
| GO_MITOCHONDRIAL_MEMBRANE_ORGANIZATION                                                       | 89  | 1.05E-03 |
| GO_SPLICEOSOMAL_TRI_SNRNP_COMPLEX                                                            | 26  | 1.07E-03 |
| GO_GOLGI_ASSOCIATED_VESICLE                                                                  | 70  | 1.07E-03 |
| GO_REGULATION_OF_CYTOKINE_SECRETION                                                          | 116 | 1.07E-03 |
| GO_REGULATION_OF_INFLAMMATORY_RESPONSE                                                       | 221 | 1.07E-03 |
| GO_POSITIVE_REGULATION_OF_LEUKOCYTE_CHEMOTAXIS                                               | 66  | 1.07E-03 |
| GO_PROTEASE_BINDING                                                                          | 86  | 1.10E-03 |
| KEGG_SPLICEOSOME                                                                             | 124 | 1.11E-03 |
| GO_CELLULAR_RESPONSE_TO_PEPTIDE                                                              | 203 | 1.12E-03 |
| GO_CELL_CHEMOTAXIS                                                                           | 129 | 1.13E-03 |
| PID_HIF2PATHWAY                                                                              | 30  | 1.14E-03 |
| GO_REGULATION_OF_MAP_KINASE_ACTIVITY                                                         | 259 | 1.14E-03 |
| GO_REGULATION_OF_TELOMERASE_RNA_LOCALIZATION_TO_CAJAL_BODY                                   | 15  | 1.16E-03 |
| GO_ENDOCYTTIC_VESICLE                                                                        | 213 | 1.21E-03 |
| GO_COPI_COATED_VESICLE                                                                       | 22  | 1.21E-03 |
| GO_MHC_CLASS_II_PROTEIN_COMPLEX                                                              | 14  | 1.21E-03 |
| GO_REGULATION_OF_CANONICAL_WNT_SIGNALING_PATHWAY                                             | 184 | 1.21E-03 |
| GO_LEUKOCYTE_CHEMOTAXIS                                                                      | 94  | 1.22E-03 |
| GO_RIBOSOMAL_SMALL_SUBUNIT_BIOGENESIS                                                        | 57  | 1.23E-03 |
| GO_RESPONSE_TO_INORGANIC_SUBSTANCE                                                           | 361 | 1.23E-03 |



|                                                                           |     |          |
|---------------------------------------------------------------------------|-----|----------|
| GO_NEGATIVE_REGULATION_OF_WNT_SIGNALING_PATHWAY                           | 150 | 1.27E-03 |
| GO_SMALL_MOLECULE_CATABOLIC_PROCESS                                       | 260 | 1.27E-03 |
| GO_REGULATION_OF_CELLULAR_KETONE_METABOLIC_PROCESS                        | 132 | 1.27E-03 |
| REACTOME_LATENT_INFECTION_OF_HOMO_SAPIENS_WITH_MYCOBACTERIUM_TUBERCULOSIS | 25  | 1.32E-03 |
| GO_SULFUR_COMPOUND_METABOLIC_PROCESS                                      | 274 | 1.32E-03 |
| GO_THREONINE_TYPE_PEPTIDASE_ACTIVITY                                      | 19  | 1.32E-03 |
| GO_RIBONUCLEOPROTEIN_COMPLEX_SUBUNIT_ORGANIZATION                         | 181 | 1.33E-03 |
| GO_REGULATION_OF_PROTEIN_SERINE_THREONINE_KINASE_ACTIVITY                 | 392 | 1.36E-03 |
| REACTOME_SIGNALLING_BY_NGF                                                | 195 | 1.40E-03 |
| GO_COENZYME_METABOLIC_PROCESS                                             | 222 | 1.41E-03 |
| GO_POSITIVE_REGULATION_OF_CELL_ADHESION                                   | 298 | 1.41E-03 |
| REACTOME_ANTIGEN_PROCESSING_UBIQUITINATION_PROTEASOME_DEGRADATION         | 184 | 1.44E-03 |
| KEGG_PATHOGENIC_ESCHERICHIA_COLI_INFECTION                                | 48  | 1.48E-03 |
| GO_RESPONSE_TO_GROWTH_FACTOR                                              | 341 | 1.54E-03 |
| GO_LEUKOCYTE_MIGRATION                                                    | 217 | 1.55E-03 |
| GO_CELLULAR_RESPONSE_TO_INTERLEUKIN_4                                     | 24  | 1.56E-03 |
| GO_PROTON_TRANSPORTING_ATP_SYNTHASE_ACTIVITY_ROTATIONAL_MECHANISM         | 11  | 1.57E-03 |
| GO_NEGATIVE_REGULATION_OF_RESPONSE_TO_WOUNDING                            | 109 | 1.58E-03 |
| KEGG_VIRAL_MYOCARDITIS                                                    | 55  | 1.60E-03 |
| GO_ANGIOGENESIS                                                           | 209 | 1.60E-03 |
| GO_REGULATION_OF_LEUKOCYTE_DIFFERENTIATION                                | 194 | 1.61E-03 |
| GO_RESPONSE_TO_VIRUS                                                      | 202 | 1.64E-03 |
| GO_ORGANELLE_ENVELOPE_LUMEN                                               | 72  | 1.64E-03 |
| GO_NEGATIVE_REGULATION_OF_TRANSPORT                                       | 336 | 1.67E-03 |
| GO_REGULATION_OF_TRANSLATIONAL_INITIATION                                 | 77  | 1.69E-03 |
| GO_NEGATIVE_REGULATION_OF_IMMUNE_SYSTEM_PROCESS                           | 306 | 1.70E-03 |
| GO_LEUKOCYTE_ACTIVATION                                                   | 353 | 1.77E-03 |
| GO_GLUCOSE_6_PHOSPHATE_METABOLIC_PROCESS                                  | 18  | 1.77E-03 |
| REACTOME_MRNA_SPLICING                                                    | 105 | 1.94E-03 |
| GO_RESPONSE_TO_MECHANICAL_STIMULUS                                        | 146 | 1.97E-03 |
| GO_PROTEIN_EXIT_FROM_ENDOPLASMIC_RETICULUM                                | 19  | 1.97E-03 |
| REACTOME_KERATAN_SULFATE_KERATIN_METABOLISM                               | 18  | 1.99E-03 |
| GO_NAD_METABOLIC_PROCESS                                                  | 44  | 1.99E-03 |
| GO_REGULATION_OF_SMOOTH_MUSCLE_CELL_PROLIFERATION                         | 78  | 1.99E-03 |
| REACTOME_CELL_CYCLE_CHECKPOINTS                                           | 108 | 1.99E-03 |
| GO_ATPASE_COUPLED_ION_TRANSMEMBRANE_TRANSPORTER_ACTIVITY                  | 58  | 1.99E-03 |
| REACTOME_TRANSFERRIN_ENDOCYTOSIS_AND_RECYCLING                            | 20  | 1.99E-03 |
| GO_SIGNAL_TRANSDUCTION_BY_PROTEIN_PHOSPHORYLATION                         | 322 | 2.01E-03 |
| BIOCARTA_CDK5_PATHWAY                                                     | 10  | 2.01E-03 |
| GO_KERATAN_SULFATE_METABOLIC_PROCESS                                      | 21  | 2.06E-03 |
| GO_CHAPERONE_MEDIATED_PROTEIN_FOLDING                                     | 45  | 2.08E-03 |
| GO_ANTIGEN_PROCESSING_AND_PRESENTATION_OF_ENDOGENOUS_PEPTIDE_ANTIGEN      | 13  | 2.10E-03 |
| GO_ENDOPLASMIC_RETICULUM_CHAPERONE_COMPLEX                                | 10  | 2.11E-03 |
| GO_POSITIVE_REGULATION_OF_CHEMOTAXIS                                      | 91  | 2.12E-03 |
| GO_NUCLEOTIDE_PHOSPHORYLATION                                             | 47  | 2.13E-03 |
| REACTOME_HEMOSTASIS                                                       | 368 | 2.14E-03 |
| GO_RIBOSOMAL_SMALL_SUBUNIT_ASSEMBLY                                       | 17  | 2.14E-03 |
| GO_DEFENSE_RESPONSE_TO_FUNGUS                                             | 22  | 2.16E-03 |
| GO_PROTEIN_CHANNEL_ACTIVITY                                               | 11  | 2.17E-03 |
| GO_REGULATION_OF_INTERFERON_GAMMA_PRODUCTION                              | 80  | 2.19E-03 |
| GO_PHAGOCYTIC_VESICLE_MEMBRANE                                            | 53  | 2.21E-03 |
| GO_CELLULAR_RESPONSE_TO_OXIDATIVE_STRESS                                  | 163 | 2.24E-03 |
| GO_CELLULAR_RESPONSE_TO_BIOTIC_STIMULUS                                   | 148 | 2.24E-03 |
| GO_ENDOPLASMIC_RETICULUM_TO_CYTOSOL_TRANSPORT                             | 20  | 2.27E-03 |
| BIOCARTA_INTEGRIN_PATHWAY                                                 | 35  | 2.31E-03 |
| GO_AMINOGLYCAN_METABOLIC_PROCESS                                          | 117 | 2.32E-03 |
| GO_INTRINSIC_COMPONENT_OF_MITOCHONDRIAL_MEMBRANE                          | 44  | 2.32E-03 |
| GO_CLATHRIN_COATED_VESICLE_MEMBRANE                                       | 65  | 2.32E-03 |
| GO_PYRUVATE_METABOLIC_PROCESS                                             | 46  | 2.33E-03 |
| GO_SERINE_TYPE_CARBOXYPEPTIDASE_ACTIVITY                                  | 10  | 2.33E-03 |
| GO_ER_ASSOCIATED_UBIQUITIN_DEPENDENT_PROTEIN_CATABOLIC_PROCESS            | 60  | 2.33E-03 |
| GO_AEROBIC_RESPIRATION                                                    | 47  | 2.34E-03 |
| GO_MUCOPOLYSACCHARIDE_METABOLIC_PROCESS                                   | 76  | 2.37E-03 |
| GO_CELLULAR_RESPONSE_TO_LIPID                                             | 350 | 2.37E-03 |
| GO_CELLULAR_RESPONSE_TO_INTERLEUKIN_1                                     | 64  | 2.38E-03 |
| GO_POSITIVE_REGULATION_OF_WNT_SIGNALING_PATHWAY                           | 123 | 2.40E-03 |
| GO_RAGE_RECEPTOR_BINDING                                                  | 10  | 2.40E-03 |
| GO_POSITIVE_REGULATION_OF_MITOCHONDRION_ORGANIZATION                      | 145 | 2.43E-03 |

|                                                                                   |     |          |
|-----------------------------------------------------------------------------------|-----|----------|
| GO_CLATHRIN_COATED_ENDOCYTIC_VESICLE_MEMBRANE                                     | 38  | 2.45E-03 |
| GO_REGULATION_OF_MITOCHONDRION_ORGANIZATION                                       | 190 | 2.45E-03 |
| GO_RIBOSOMAL_LARGE_SUBUNIT_BIOGENESIS                                             | 46  | 2.56E-03 |
| GO_EXTERNAL_SIDE_OF_PLASMA_MEMBRANE                                               | 179 | 2.70E-03 |
| PID_PDGFRB_PATHWAY                                                                | 126 | 2.72E-03 |
| GO_RECEPTOR_MEDIATED_ENDOCYTOSIS                                                  | 171 | 2.73E-03 |
| KEGG_ASTHMA                                                                       | 21  | 2.78E-03 |
| GO_SUBSTANTIA_NIGRA_DEVELOPMENT                                                   | 40  | 2.78E-03 |
| GO_OUTER_MEMBRANE                                                                 | 162 | 2.78E-03 |
| NABA_MATRISOME_ASSOCIATED                                                         | 389 | 2.80E-03 |
| GO_REGULATION_OF_HEMOPOIESIS                                                      | 265 | 2.90E-03 |
| GO_CYTOKINE_BINDING                                                               | 69  | 2.90E-03 |
| GO_NEGATIVE_REGULATION_OF_ENDOPLASMIC_RETICULUM_UNFOLDED_PROTEIN_RESPONSE         | 10  | 2.90E-03 |
| GO_MONOVALENT_INORGANIC_CATION_TRANSPORT                                          | 266 | 2.91E-03 |
| GO_RIBOSOMAL_LARGE_SUBUNIT_ASSEMBLY                                               | 21  | 3.06E-03 |
| GO_MHC_CLASS_II_PROTEIN_COMPLEX_BINDING                                           | 15  | 3.11E-03 |
| GO_ION_CHANNEL_BINDING                                                            | 82  | 3.12E-03 |
| GO_REGULATION_OF_I_KAPPAB_KINASE_NF_KAPPAB_SIGNALING                              | 214 | 3.15E-03 |
| GO_RETROGRADE_PROTEIN_TRANSPORT_ER_TO_CYTOSOL                                     | 15  | 3.19E-03 |
| GO_NEGATIVE_REGULATION_OF_MULTI_ORGANISM_PROCESS                                  | 124 | 3.28E-03 |
| GO_MONOSACCHARIDE_CATABOLIC_PROCESS                                               | 47  | 3.28E-03 |
| GO_TRANSLATION_ELONGATION_FACTOR_ACTIVITY                                         | 19  | 3.28E-03 |
| GO_U12_TYPE_SPLICEOSOMAL_COMPLEX                                                  | 25  | 3.29E-03 |
| GO_NEGATIVE_REGULATION_OF_DEFENSE_RESPONSE                                        | 114 | 3.30E-03 |
| GO_NEGATIVE_REGULATION_OF_PROTEIN_BINDING                                         | 69  | 3.31E-03 |
| HALLMARK_GLYCOLYSIS                                                               | 171 | 3.31E-03 |
| GO_DETOXIFICATION                                                                 | 58  | 3.48E-03 |
| GO_REGULATION_OF_HOMEOSTATIC_PROCESS                                              | 339 | 3.58E-03 |
| GO_SEQUESTERING_OF_METAL_ION                                                      | 8   | 3.62E-03 |
| HALLMARK_PEROXISOME                                                               | 91  | 3.70E-03 |
| GO_HEXOSE_METABOLIC_PROCESS                                                       | 126 | 3.70E-03 |
| REACTOME_GLYCOSAMINOGLYCAN_METABOLISM                                             | 72  | 3.76E-03 |
| GO_VESICLE_COAT                                                                   | 42  | 3.76E-03 |
| GO_CYTOKINE_ACTIVITY                                                              | 121 | 3.77E-03 |
| GO_POSITIVE_REGULATION_OF_LEUKOCYTE_MIGRATION                                     | 90  | 3.77E-03 |
| GO_CELLULAR_CHEMICAL_HOMEOSTASIS                                                  | 397 | 3.85E-03 |
| GO_HEXOSE_CATABOLIC_PROCESS                                                       | 38  | 3.85E-03 |
| GO_POSITIVE_REGULATION_OF_PROTEIN_TARGETING_TO_MEMBRANE                           | 15  | 4.04E-03 |
| GO_REGULATION_OF_VIRAL_ENTRY_INTO_HOST_CELL                                       | 21  | 4.08E-03 |
| GO_ERAD_PATHWAY                                                                   | 73  | 4.08E-03 |
| GO_PATTERN_RECOGNITION_RECEPTOR_SIGNALING_PATHWAY                                 | 101 | 4.11E-03 |
| GO_PROTEIN_TETRAMERIZATION                                                        | 109 | 4.33E-03 |
| REACTOME_GLYCOSPHINGOLIPID_METABOLISM                                             | 29  | 4.33E-03 |
| REACTOME_SIGNALING_BY_INSULIN_RECEPTOR                                            | 80  | 4.37E-03 |
| GO_ATP_GENERATION_FROM_ADP                                                        | 29  | 4.37E-03 |
| GO_INTRINSIC_COMPONENT_OF_MITOCHONDRIAL_OUTER_MEMBRANE                            | 21  | 4.50E-03 |
| GO_NEGATIVE_REGULATION_OF_IMMUNE_EFFECTOR_PROCESS                                 | 86  | 4.70E-03 |
| GO_CELLULAR_RESPONSE_TO_HORMONE_STIMULUS                                          | 405 | 4.71E-03 |
| GO_LIPOPOLYSACCHARIDE_MEDIATED_SIGNALING_PATHWAY                                  | 31  | 4.72E-03 |
| GO_REGULATION_OF_MITOCHONDRIAL_MEMBRANE_POTENTIAL                                 | 49  | 4.72E-03 |
| GO_PLASMA_MEMBRANE_PROTEIN_COMPLEX                                                | 332 | 4.79E-03 |
| REACTOME_IMMUNOREGULATORY_INTERACTIONS_BETWEEN_A_LYMPHOID_AND_A_NON_LYMPHOID_CELL | 57  | 4.80E-03 |
| GO_NADH_METABOLIC_PROCESS                                                         | 29  | 4.82E-03 |
| GO_ARP2_3_PROTEIN_COMPLEX                                                         | 11  | 4.82E-03 |
| GO_REGENERATION                                                                   | 115 | 4.83E-03 |
| GO_MEMBRANE_MICRODOMAIN                                                           | 230 | 4.83E-03 |
| REACTOME_METABOLISM_OF_AMINO_ACIDS_AND_DERIVATIVES                                | 154 | 4.84E-03 |
| GO_BINDING_OF_SPERM_TO_ZONA_PELLUCIDA                                             | 19  | 4.85E-03 |
| GO_AMINOGLYCAN_BIOSYNTHETIC_PROCESS                                               | 72  | 4.86E-03 |
| GO_WOUND_HEALING                                                                  | 344 | 4.88E-03 |
| GO_HUMORAL_IMMUNE_RESPONSE                                                        | 120 | 5.00E-03 |
| GO_TRANS_GOLGI_NETWORK_TRANSPORT_VESICLE                                          | 25  | 5.01E-03 |
| GO_NEGATIVE_REGULATION_OF_INTRINSIC_APOPTOTIC_SIGNALING_PATHWAY                   | 75  | 5.03E-03 |
| REACTOME_IRON_UPTAKE_AND_TRANSPORT                                                | 30  | 5.06E-03 |
| GO_REGULATION_OF_RESPONSE_TO_BIOTIC_STIMULUS                                      | 192 | 5.09E-03 |
| GO_REGULATION_OF_DEFENSE_RESPONSE_TO_VIRUS                                        | 154 | 5.10E-03 |
| GO_INSULIN_RECEPTOR_SIGNALING_PATHWAY                                             | 63  | 5.12E-03 |
| GO_EPHRIN_RECEPTOR_SIGNALING_PATHWAY                                              | 70  | 5.15E-03 |

|                                                                   |     |          |
|-------------------------------------------------------------------|-----|----------|
| GO_MONOCYTE_CHEMOTAXIS                                            | 26  | 5.16E-03 |
| GO_ORGAN_REGENERATION                                             | 64  | 5.29E-03 |
| GO_REGULATION_OF_LEUKOCYTE_PROLIFERATION                          | 176 | 5.45E-03 |
| GO_FC_GAMMA_RECEPTOR_SIGNALING_PATHWAY                            | 83  | 5.45E-03 |
| GO_LIPID_PARTICLE                                                 | 56  | 5.46E-03 |
| GO_RESPONSE_TO_EXTRACELLULAR_STIMULUS                             | 315 | 5.47E-03 |
| GO_REGULATION_OF_CYTOKINE_PRODUCTION_INVOLVED_IN_IMMUNE_RESPONSE  | 54  | 5.50E-03 |
| KEGG_NATURAL_KILLER_CELL_MEDIATED_CYTOTOXICITY                    | 105 | 5.50E-03 |
| GO_RESPONSE_TO_INTERLEUKIN_4                                      | 28  | 5.55E-03 |
| GO_ACTIVATION_OF_CYSTEINE_TYPE_ENDOPEPTIDASE_ACTIVITY             | 89  | 5.71E-03 |
| GO_REGULATION_OF_INTERLEUKIN_6_PRODUCTION                         | 87  | 5.71E-03 |
| PID_UPA_UPAR_PATHWAY                                              | 30  | 5.97E-03 |
| GO_CARBOHYDRATE_DERIVATIVE_CATABOLIC_PROCESS                      | 138 | 6.03E-03 |
| GO_LEUKOCYTE_MEDIATED_CYTOTOXICITY                                | 27  | 6.04E-03 |
| GO_REGULATION_OF_LEUKOCYTE_MIGRATION                              | 119 | 6.09E-03 |
| REACTOME_EXTRACELLULAR_MATRIX_ORGANIZATION                        | 47  | 6.09E-03 |
| GO_CELL_PROLIFERATION                                             | 492 | 6.09E-03 |
| GO_CELLULAR_RESPONSE_TO_EXTERNAL_STIMULUS                         | 207 | 6.13E-03 |
| GO_SERINE_TYPE_EXOPEPTIDASE_ACTIVITY                              | 12  | 6.14E-03 |
| GO_NF_KAPPAB_BINDING                                              | 30  | 6.19E-03 |
| GO GRANULOCYTE_MIGRATION                                          | 55  | 6.22E-03 |
| GO_NEGATIVE_REGULATION_OF_ESTABLISHMENT_OF_PROTEIN_LOCALIZATION   | 165 | 6.23E-03 |
| PID_CASPASE_PATHWAY                                               | 51  | 6.23E-03 |
| GO_REGULATION_OF_VASCULATURE_DEVELOPMENT                          | 165 | 6.24E-03 |
| GO_ADAPTIVE_IMMUNE_RESPONSE                                       | 229 | 6.24E-03 |
| GO_CARBOHYDRATE_CATABOLIC_PROCESS                                 | 87  | 6.25E-03 |
| GO_REGULATION_OF_CELL_ADHESION                                    | 497 | 6.38E-03 |
| BIOCARTA_IGF1_PATHWAY                                             | 20  | 6.41E-03 |
| GO_NEURAL_NUCLEUS_DEVELOPMENT                                     | 46  | 6.60E-03 |
| GO_CALCIIUM_DEPENDENT_PROTEIN_BINDING                             | 46  | 6.66E-03 |
| GO_REGULATION_OF_INTRINSIC_APOPTOTIC_SIGNALING_PATHWAY            | 124 | 6.68E-03 |
| GO_ORGANELLAR_LARGE_RIBOSOMAL_SUBUNIT                             | 31  | 6.73E-03 |
| GO_REGULATION_OF_CALCIIUM_ION_TRANSPORT_INTO_CYTOSOL              | 60  | 6.82E-03 |
| GO_LIPOSACCHARIDE_METABOLIC_PROCESS                               | 91  | 6.83E-03 |
| GO_NEGATIVE_REGULATION_OF_MAP_KINASE_ACTIVITY                     | 60  | 6.99E-03 |
| GO_REGULATION_OF_ACUTE_INFLAMMATORY_RESPONSE                      | 57  | 7.04E-03 |
| GO_MONOVALENT_INORGANIC_CATION_TRANSMEMBRANE_TRANSPORTER_ACTIVITY | 205 | 7.04E-03 |
| PID_ERBB1_DOWNSTREAM_PATHWAY                                      | 103 | 7.05E-03 |
| GO_CELLULAR_LIPID_CATABOLIC_PROCESS                               | 116 | 7.13E-03 |
| GO_POSITIVE_REGULATION_OF_BINDING                                 | 106 | 7.15E-03 |
| GO_POSITIVE_REGULATION_OF_ACTIN_CYTOSKELETON_REORGANIZATION       | 12  | 7.25E-03 |
| GO_REGULATION_OF_LEUKOCYTE_CHEMOTAXIS                             | 77  | 7.26E-03 |
| GO_NEGATIVE_REGULATION_OF_VIRAL_PROCESS                           | 78  | 7.27E-03 |
| GO_ZYMOGEN_ACTIVATION                                             | 95  | 7.27E-03 |
| GO_REGULATION_OF_RESPONSE_TO_EXTRACELLULAR_STIMULUS               | 154 | 7.27E-03 |
| GO_MITOCHONDRIAL_TRANSLATION                                      | 105 | 7.28E-03 |
| GO_CELLULAR_RESPONSE_TO_ARSENIC_CONTAINING_SUBSTANCE              | 14  | 7.31E-03 |
| GO_HEAT_SHOCK_PROTEIN_BINDING                                     | 82  | 7.33E-03 |
| GO_CYTOKINE_RECEPTOR_BINDING                                      | 179 | 7.39E-03 |
| GO_INORGANIC_ION_TRANSMEMBRANE_TRANSPORT                          | 348 | 7.54E-03 |
| PID_CD8_TCR_DOWNSTREAM_PATHWAY                                    | 52  | 7.55E-03 |
| GO_RESPONSE_TO_UV_B                                               | 14  | 7.55E-03 |
| GO_PH_REDUCTION                                                   | 32  | 7.57E-03 |
| GO_MULTI_ORGANISM_MEMBRANE_ORGANIZATION                           | 29  | 7.61E-03 |
| GO_TAXIS                                                          | 322 | 7.78E-03 |
| GO_MITOCHONDRIAL_ELECTRON_TRANSPORT_UBIQUINOL_TO_CYTOCHROME_C     | 12  | 7.83E-03 |
| GO_REGULATION_OF_RELEASE_OF_SEQUESTERED_CALCIIUM_ION_INTO_CYTOSOL | 50  | 7.85E-03 |
| GO_MONOSACCHARIDE_BINDING                                         | 59  | 7.87E-03 |
| GO_COPI_VESICLE_COAT                                              | 12  | 8.09E-03 |
| REACTOME_NGF_SIGNALLING_VIA_TRKA_FROM_THE_PLASMA_MEMBRANE         | 121 | 8.30E-03 |
| GO_NEURON_DEATH                                                   | 37  | 8.42E-03 |
| GO_GLUCOSE_METABOLIC_PROCESS                                      | 95  | 8.47E-03 |
| GO_NEGATIVE_REGULATION_OF_PHOSPHORYLATION                         | 332 | 8.48E-03 |
| GO_REGULATION_OF_ERBB_SIGNALING_PATHWAY                           | 68  | 8.55E-03 |
| GO_SULFUR_COMPOUND_BIOSYNTHETIC_PROCESS                           | 155 | 8.69E-03 |
| BIOCARTA_SRCRPT_PATHWAY                                           | 10  | 8.81E-03 |
| GO_REACTIVE_OXYGEN_SPECIES_METABOLIC_PROCESS                      | 72  | 8.83E-03 |
| GO_SPHINGOLIPID_METABOLIC_PROCESS                                 | 110 | 8.90E-03 |

|                                                                                      |     |          |
|--------------------------------------------------------------------------------------|-----|----------|
| GO_POSITIVE_REGULATION_OF_ACTIN_FILAMENT_POLYMERIZATION                              | 59  | 8.91E-03 |
| GO_REGULATION_OF_HOMOTYPIC_CELL_CELL_ADHESION                                        | 264 | 8.92E-03 |
| GO_REGULATION_OF_WNT_SIGNALING_PATHWAY                                               | 236 | 9.09E-03 |
| GO_REGULATION_OF_MORPHOGENESIS_OF_A_BRANCHING_STRUCTURE                              | 26  | 9.10E-03 |
| GO_APOPTOTIC_SIGNALING_PATHWAY                                                       | 262 | 9.26E-03 |
| GO_DE_NOVO_PROTEIN_FOLDING                                                           | 18  | 9.30E-03 |
| GO_POSITIVE_REGULATION_OF_PRODUCTION_OF_MOLECULAR_MEDIATOR_OF_IMMUNE_RESPONSE        | 55  | 9.37E-03 |
| GO_COPI_COATED_VESICLE_MEMBRANE                                                      | 16  | 9.48E-03 |
| GO_POSITIVE_REGULATION_OF_RESPONSE_TO_EXTERNAL_STIMULUS                              | 224 | 9.54E-03 |
| GO_REGULATION_OF_ERK1_AND_ERK2_CASCADE                                               | 158 | 9.54E-03 |
| GO_VIRION_ASSEMBLY                                                                   | 35  | 9.74E-03 |
| GO_INACTIVATION_OF_MAPK_ACTIVITY                                                     | 22  | 9.79E-03 |
| GO_MESODERM_DEVELOPMENT                                                              | 78  | 9.99E-03 |
| BIOCARTA_MTA3_PATHWAY                                                                | 15  | 1.00E-02 |
| GO_LEUKOCYTE_CELL_CELL_ADHESION                                                      | 215 | 1.01E-02 |
| GO_NEGATIVE_REGULATION_OF_KINASE_ACTIVITY                                            | 195 | 1.01E-02 |
| GO_ION_HOMEOSTASIS                                                                   | 400 | 1.01E-02 |
| GO_SMOOTH_ENDOPLASMIC_RETICULUM                                                      | 25  | 1.01E-02 |
| GO_PHOSPHOLIPASE_INHIBITOR_ACTIVITY                                                  | 8   | 1.01E-02 |
| GO_TOXIN_TRANSPORT                                                                   | 34  | 1.01E-02 |
| GO_GLYCOLIPID_CATABOLIC_PROCESS                                                      | 10  | 1.01E-02 |
| REACTOME_SIGNALLING_TO_RAS                                                           | 24  | 1.01E-02 |
| GO_POSITIVE_REGULATION_OF_PROTEIN_SECRETION                                          | 156 | 1.01E-02 |
| GO_CELLULAR_RESPONSE_TO_ATP                                                          | 11  | 1.01E-02 |
| GO_REGULATION_OF_CALCIIUM_ION_IMPORT                                                 | 66  | 1.02E-02 |
| KEGG_N_GLYCAN_BIOSYNTHESIS                                                           | 44  | 1.02E-02 |
| REACTOME_SIGNAL_TRANSDUCTION_BY_L1                                                   | 32  | 1.02E-02 |
| GO_POSITIVE_REGULATION_OF_PROTEIN_COMPLEX_ASSEMBLY                                   | 168 | 1.02E-02 |
| GO_CLATHRIN_COATED_VESICLE                                                           | 130 | 1.02E-02 |
| GO_POSITIVE_REGULATION_OF_CYTOSKELETON_ORGANIZATION                                  | 145 | 1.02E-02 |
| REACTOME_POST_CHAPERONIN_TUBULIN_FOLDING_PATHWAY                                     | 13  | 1.04E-02 |
| GO_NEGATIVE_REGULATION_OF_NF_KAPPAB_IMPORT_INTO_NUCLEUS                              | 16  | 1.05E-02 |
| PID_IL2_1PATHWAY                                                                     | 54  | 1.06E-02 |
| KEGG_CELL_ADHESION_MOLECULES_CAMS                                                    | 105 | 1.06E-02 |
| BIOCARTA_BARRESTIN_SRC_PATHWAY                                                       | 13  | 1.06E-02 |
| GO_RESPONSE_TO_FUNGUS                                                                | 33  | 1.07E-02 |
| GO_ORGANIC_ACID_BIOSYNTHETIC_PROCESS                                                 | 208 | 1.10E-02 |
| GO_NEGATIVE_REGULATION_OF_CELL_PROLIFERATION                                         | 480 | 1.10E-02 |
| GO_REGULATION_OF_SENSORY_PERCEPTION                                                  | 20  | 1.12E-02 |
| GO_NEGATIVE_REGULATION_OF_PROTEIN_SECRETION                                          | 78  | 1.13E-02 |
| GO_REGULATION_OF_PH                                                                  | 65  | 1.14E-02 |
| REACTOME_SPRY_REGULATION_OF_FGF_SIGNALING                                            | 13  | 1.14E-02 |
| GO_VASCULAR_ENDOTHELIAL_GROWTH_FACTOR_RECEPTOR_SIGNALING_PATHWAY                     | 66  | 1.14E-02 |
| GO_NEGATIVE_REGULATION_OF_TYPE_2_IMMUNE_RESPONSE                                     | 8   | 1.14E-02 |
| REACTOME_CTNB1_PHOSPHORYLATION_CASCADE                                               | 15  | 1.15E-02 |
| GO_POSITIVE_REGULATION_OF_VIRAL_PROCESS                                              | 82  | 1.18E-02 |
| GO_REGULATION_OF_INTERLEUKIN_1_PRODUCTION                                            | 51  | 1.18E-02 |
| GO_COATED_MEMBRANE                                                                   | 79  | 1.19E-02 |
| GO_MAP_KINASE_PHOSPHATASE_ACTIVITY                                                   | 12  | 1.19E-02 |
| GO_POSITIVE_REGULATION_OF_MESONEPHROS_DEVELOPMENT                                    | 10  | 1.21E-02 |
| GO_REGULATION_OF_REACTIVE_OXYGEN_SPECIES_BIOSYNTHETIC_PROCESS                        | 51  | 1.21E-02 |
| GO_POSITIVE_REGULATION_OF_CELL_CELL_ADHESION                                         | 202 | 1.23E-02 |
| GO_INTRAMOLECULAR_OXIDOREDUCTASE_ACTIVITY                                            | 47  | 1.24E-02 |
| GO_POSITIVE_REGULATION_OF_EXTRINSIC_APOPTOTIC_SIGNALING_PATHWAY_IN_ABSENCE_OF_LIGAND | 13  | 1.24E-02 |
| GO_MONOSACCHARIDE_BIOSYNTHETIC_PROCESS                                               | 46  | 1.25E-02 |
| KEGG_GLYCOSAMINOGLYCAN_DEGRADATION                                                   | 19  | 1.25E-02 |
| GO_POSITIVE_REGULATION_OF_INTRACELLULAR_PROTEIN_TRANSPORT                            | 210 | 1.27E-02 |
| GO_POSITIVE_REGULATION_OF_EXTRINSIC_APOPTOTIC_SIGNALING_PATHWAY                      | 44  | 1.28E-02 |
| GO_CELLULAR_RESPONSE_TO_HYDROGEN_PEROXIDE                                            | 58  | 1.28E-02 |
| REACTOME_ASSOCIATION_OF_TRIC_CCT_WITH_TARGET_PROTEINS_DURING_BIOSYNTHESIS            | 26  | 1.28E-02 |
| GO_GLUTATHIONE_PEROXIDASE_ACTIVITY                                                   | 13  | 1.28E-02 |
| REACTOME_NFKB_AND_MAP_KINASES_ACTIVATION_MEDIATED_BY_TLR4_SIGNALING_REPERTOIRE       | 68  | 1.30E-02 |
| GO_REGULATION_OF_CELLULAR_PH                                                         | 56  | 1.30E-02 |
| PID_IL12_2PATHWAY                                                                    | 60  | 1.33E-02 |
| GO_POSITIVE_REGULATION_OF_VASCULATURE_DEVELOPMENT                                    | 96  | 1.34E-02 |
| GO_GLUCCOSE_CATABOLIC_PROCESS                                                        | 23  | 1.34E-02 |
| GO_POSITIVE_REGULATION_OF_CYTOPLASMIC_TRANSPORT                                      | 227 | 1.35E-02 |
| GO GRANULOCYTE_ACTIVATION                                                            | 18  | 1.39E-02 |

|                                                                      |     |          |
|----------------------------------------------------------------------|-----|----------|
| GO_REGULATION_OF_ESTABLISHMENT_OF_PROTEIN_LOCALIZATION_TO_CHROMOSOME | 10  | 1.39E-02 |
| GO_GOLGI_CISTERNA                                                    | 82  | 1.40E-02 |
| GO_CELLULAR_RESPONSE_TO_ABIOTIC_STIMULUS                             | 197 | 1.40E-02 |
| GO_NEGATIVE_REGULATION_OF_RESPONSE_TO_EXTERNAL_STIMULUS              | 194 | 1.41E-02 |
| REACTOME_GLYCONEOGENESIS                                             | 26  | 1.41E-02 |
| GO_NEGATIVE_REGULATION_OF_CELL_GROWTH                                | 125 | 1.43E-02 |
| GO_POSITIVE_REGULATION_OF_LEUKOCYTE_PROLIFERATION                    | 115 | 1.43E-02 |
| GO_REGULATION_OF_ALPHA_BETA_T_CELL_ACTIVATION                        | 63  | 1.45E-02 |
| REACTOME_G1_PHASE                                                    | 35  | 1.45E-02 |
| GO_FORMATION_OF_PRIMARY_GERM_LAYER                                   | 76  | 1.45E-02 |
| GO_MACROAUTOPHAGY                                                    | 220 | 1.45E-02 |
| GO_REGULATION_OF_TYPE_I_INTERFERON_PRODUCTION                        | 107 | 1.48E-02 |
| REACTOME_CLASS_A1_RHODOPSIN_LIKE_RECEPTORS                           | 151 | 1.48E-02 |
| BIOCARTA_HSP27_PATHWAY                                               | 14  | 1.48E-02 |
| GO_KERATAN_SULFATE_BIOSYNTHETIC_PROCESS                              | 16  | 1.51E-02 |
| GO_REGULATION_OF_DEFENSE_RESPONSE_TO_VIRUS_BY_HOST                   | 101 | 1.51E-02 |
| GO_UBIQUITIN_LIKE_PROTEIN_LIGASE_BINDING                             | 244 | 1.54E-02 |
| REACTOME_TRIF_MEDIATED_TLR3_SIGNALING                                | 70  | 1.54E-02 |
| PID_S1P_S1P2_PATHWAY                                                 | 24  | 1.54E-02 |
| GO_PYRIMIDINE_NUCLEOSIDE_METABOLIC_PROCESS                           | 41  | 1.54E-02 |
| GO_ACTIN_FILAMENT_BUNDLE_ORGANIZATION                                | 42  | 1.55E-02 |
| GO_REGULATION_OF_PROTEIN_STABILITY                                   | 192 | 1.57E-02 |
| GO_CELLULAR_RESPONSE_TO_MECHANICAL_STIMULUS                          | 61  | 1.59E-02 |
| GO_REGULATION_OF_DEFENSE_RESPONSE_TO_VIRUS_BY_VIRUS                  | 29  | 1.62E-02 |
| GO_RESPONSE_TO_PURINE_CONTAINING_COMPOUND                            | 116 | 1.62E-02 |
| GO_TRANSPORT_VESICLE_MEMBRANE                                        | 116 | 1.62E-02 |
| REACTOME_SIGNALING_BY_EGFR_IN_CANCER                                 | 98  | 1.66E-02 |
| GO_POSITIVE_REGULATION_OF_HOMEOSTATIC_PROCESS                        | 163 | 1.67E-02 |
| GO_REGULATION_OF_HUMORAL_IMMUNE_RESPONSE                             | 38  | 1.68E-02 |
| GO_MONOCARBOXYLIC_ACID_CATABOLIC_PROCESS                             | 78  | 1.69E-02 |
| GO_MULTICELLULAR_ORGANISMAL_HOMEOSTASIS                              | 185 | 1.69E-02 |
| GO_POSITIVE_REGULATION_OF_INTERLEUKIN_6_PRODUCTION                   | 55  | 1.69E-02 |
| GO_CLATHRIN_COATED_ENDOCYTOTIC_VESICLE                               | 49  | 1.70E-02 |
| GO_WNT_SIGNALING_PATHWAY                                             | 273 | 1.70E-02 |
| GO_POSITIVE_REGULATION_OF_SMOOTH_MUSCLE_CELL_PROLIFERATION           | 51  | 1.70E-02 |
| GO_GDP DISSOCIATION INHIBITOR ACTIVITY                               | 10  | 1.71E-02 |
| GO_PROTEIN_POLYUBIQUITINATION                                        | 237 | 1.71E-02 |
| GO_POSITIVE_REGULATION_OF_MONOCYTE_CHEMOTAXIS                        | 12  | 1.71E-02 |
| GO_LYMPHOCYTE_MEDIATED_IMMUNITY                                      | 114 | 1.72E-02 |
| GO_REGULATION_OF_PRODUCTION_OF_MOLECULAR_MEDIATOR_OF_IMMUNE_RESPONSE | 87  | 1.73E-02 |
| GO_MYELOID_LEUKOCYTE_MIGRATION                                       | 75  | 1.74E-02 |
| GO_CELLULAR_CARBOHYDRATE_BIOSYNTHETIC_PROCESS                        | 41  | 1.75E-02 |
| GO_REGULATION_OF_PROTEIN_LOCALIZATION_TO_CHROMOSOME_TELOMERIC_REGION | 14  | 1.75E-02 |
| BIOCARTA_KREB_PATHWAY                                                | 8   | 1.76E-02 |
| GO_FIBROBLAST_GROWTH_FACTOR_RECEPTOR_SIGNALING_PATHWAY               | 57  | 1.76E-02 |
| REACTOME_SOS_MEDIATED_SIGNALING                                      | 14  | 1.76E-02 |
| GO_GOLGI_ASSOCIATED_VESICLE_MEMBRANE                                 | 42  | 1.76E-02 |
| SIG_INSULIN_RECEPTOR_PATHWAY_IN_CARDIAC_MYOCYTES                     | 47  | 1.76E-02 |
| GO_CELL_REDOX_HOMEOSTASIS                                            | 59  | 1.76E-02 |
| REACTOME_SHC_MEDIATED_SIGNALING                                      | 14  | 1.76E-02 |
| GO_MODIFICATION_OF_MORPHOLOGY_OR_PHYSIOLOGY_OF_OTHER_ORGANISM        | 82  | 1.76E-02 |
| REACTOME_SPHINGOLIPID_METABOLISM                                     | 57  | 1.76E-02 |
| KEGG_GLYCOSPHINGOLIPID_BIOSYNTHESIS_LACTO_AND_NEOLACTO_SERIES        | 14  | 1.78E-02 |
| GO_REGULATION_OF_ACTIN_FILAMENT_LENGTH                               | 132 | 1.78E-02 |
| GO_NEGATIVE_REGULATION_OF_I_KAPPAB_KINASE_NF_KAPPAB_SIGNALING        | 46  | 1.78E-02 |
| GO_COGNITION                                                         | 158 | 1.79E-02 |
| GO_REGULATION_OF_ACTIN_FILAMENT_BASED_PROCESS                        | 244 | 1.81E-02 |
| GO_PROTEIN_KINASE_C_BINDING                                          | 45  | 1.82E-02 |
| NABA_SECRETED_FACTORS                                                | 163 | 1.82E-02 |
| GO_LYMPHOCYTE_ACTIVATION                                             | 296 | 1.83E-02 |
| GO_REGULATION_OF_CELL_CELL_ADHESION                                  | 314 | 1.84E-02 |
| GO_SERINE_HYDROLASE_ACTIVITY                                         | 130 | 1.85E-02 |
| BIOCARTA_IL6_PATHWAY                                                 | 22  | 1.85E-02 |
| REACTOME_ENDOSOMAL_VACUOLAR_PATHWAY                                  | 9   | 1.86E-02 |
| GO_NEGATIVE_REGULATION_OF_INFLAMMATORY_RESPONSE                      | 76  | 1.90E-02 |
| GO_MICROVILLUS                                                       | 51  | 1.93E-02 |
| REACTOME_TRANS_GOLGI_NETWORK_VESICLE_BUDDING                         | 55  | 1.94E-02 |
| GO_LEARNING                                                          | 78  | 1.94E-02 |

|                                                                                          |     |          |
|------------------------------------------------------------------------------------------|-----|----------|
| GO_REGULATION_OF_OSSIFICATION                                                            | 127 | 1.94E-02 |
| GO_TRANSLATION_FACTOR_ACTIVITY_RNA_BINDING                                               | 82  | 1.94E-02 |
| GO_NUCLEAR_ENVELOPE_REASSEMBLY                                                           | 17  | 1.94E-02 |
| REACTOME_PROCESSING_OF_CAPPED_INTRON_CONTAINING_PRE_MRNA                                 | 134 | 1.95E-02 |
| GO_REGULATION_OF_AUTOPHAGY                                                               | 231 | 1.95E-02 |
| REACTOME_SIGNALING_BY_ILS                                                                | 101 | 1.99E-02 |
| GO_SMALL_NUCLEAR_RIBONUCLEOPROTEIN_COMPLEX                                               | 58  | 2.00E-02 |
| GO_EXTRACELLULAR_MATRIX                                                                  | 216 | 2.00E-02 |
| BIOCARTA_NGF_PATHWAY                                                                     | 17  | 2.02E-02 |
| GO_REGULATION_OF_NITRIC_OXIDE_BIOSYNTHETIC_PROCESS                                       | 40  | 2.07E-02 |
| GO_NEGATIVE_REGULATION_OF_GROWTH                                                         | 175 | 2.07E-02 |
| GO_OSSIFICATION                                                                          | 174 | 2.08E-02 |
| REACTOME_DNA_REPLICATION                                                                 | 179 | 2.08E-02 |
| GO_POSITIVE_REGULATION_OF_LEUKOCYTE_DIFFERENTIATION                                      | 112 | 2.11E-02 |
| REACTOME_MITOTIC_M_M_G1_PHASES                                                           | 159 | 2.12E-02 |
| GO_TUMOR_NECROSIS_FACTOR_RECEPTOR_SUPERFAMILY_BINDING                                    | 42  | 2.14E-02 |
| GO_REGULATION_OF_NOTCH_SIGNALING_PATHWAY                                                 | 50  | 2.16E-02 |
| GO_REGULATION_OF_SUPEROXIDE_METABOLIC_PROCESS                                            | 17  | 2.17E-02 |
| GO_MYELOID_LEUKOCYTE_MEDIATED_IMMUNITY                                                   | 38  | 2.20E-02 |
| GO_ACTIN_FILAMENT_BASED_PROCESS                                                          | 358 | 2.22E-02 |
| GO_SECRETORY_VESICLE                                                                     | 315 | 2.22E-02 |
| GO_TISSUE_HOMEOSTASIS                                                                    | 120 | 2.23E-02 |
| KEGG_GLYOXYLATE_AND_DICARBOXYLATE_METABOLISM                                             | 14  | 2.23E-02 |
| GO_MEMBRANE_BUDDING                                                                      | 104 | 2.28E-02 |
| GO_POSITIVE_REGULATION_OF_SEQUENCE_SPECIFIC_DNA_BINDING_TRANSCRIPTION_FACTOR_ACTIVITY    | 187 | 2.29E-02 |
| GO_ER_NUCLEUS_SIGNALING_PATHWAY                                                          | 31  | 2.30E-02 |
| HALLMARK_REACTIVE_OXIGEN_SPECIES_PATHWAY                                                 | 47  | 2.31E-02 |
| GO_SINGLE_ORGANISM_CELL_ADHESION                                                         | 357 | 2.32E-02 |
| REACTOME_CELL_CYCLE_MITOTIC                                                              | 296 | 2.32E-02 |
| GO_REGULATION_OF_NF_KAPPAB_IMPORT_INTO_NUCLEUS                                           | 42  | 2.32E-02 |
| GO_REGULATION_OF_PROTEIN_TARGETING                                                       | 254 | 2.34E-02 |
| BIOCARTA_CHREBP2_PATHWAY                                                                 | 36  | 2.35E-02 |
| GO_POSITIVE_REGULATION_OF_CYTOKINE_PRODUCTION_INVOLVED_IN_IMMUNE_RESPONSE                | 30  | 2.36E-02 |
| KEGG_PYRUVATE_METABOLISM                                                                 | 33  | 2.36E-02 |
| GO_MATURATION_OF_SSU_RRNA_FROM_TRICISTRONIC_RRNA_TRANSCRIPT_SSU_RRNA_5_8S_RRNA_LSU_RRNA_ | 33  | 2.36E-02 |
| GO_POSITIVE_REGULATION_OF_ALPHA_BETA_T_CELL_ACTIVATION                                   | 48  | 2.36E-02 |
| GO_CHAPERONE_BINDING                                                                     | 73  | 2.37E-02 |
| REACTOME_RESPONSE_TO_ELEVATED_PLATELET_CYTOSOLIC_CA2_                                    | 70  | 2.38E-02 |
| GO_POSITIVE_REGULATION_OF_CYTOKINE_SECRETION                                             | 76  | 2.38E-02 |
| GO_POSITIVE_REGULATION_OF_SECRETION                                                      | 258 | 2.40E-02 |
| PID_PS1_PATHWAY                                                                          | 42  | 2.40E-02 |
| KEGG_NEUROTROPHIN_SIGNALING_PATHWAY                                                      | 113 | 2.40E-02 |
| REACTOME KERATAN SULFATE BIOSYNTHESIS                                                    | 14  | 2.40E-02 |
| GO_CELLULAR_RESPONSE_TO_ORGANIC_CYCLIC_COMPOUND                                          | 348 | 2.40E-02 |
| GO_U4_U6_X_U5_TRI_SNRNP_COMPLEX                                                          | 21  | 2.41E-02 |
| PID_INTEGRIN_A4B1_PATHWAY                                                                | 30  | 2.41E-02 |
| GO_AGING                                                                                 | 204 | 2.43E-02 |
| GO_REGULATION_OF_PEPTIDE_TRANSPORT                                                       | 182 | 2.43E-02 |
| REACTOME_GOLGI_ASSOCIATED_VESICLE_BIOGENESIS                                             | 48  | 2.43E-02 |
| GO_NEGATIVE_REGULATION_OF_RESPONSE_TO_ENDOPLASMIC_RETICULUM_STRESS                       | 35  | 2.44E-02 |
| GO_REGULATION_OF_PODOSOME_ASSEMBLY                                                       | 12  | 2.44E-02 |
| GO_CDP_DIACYLGLYCEROL_METABOLIC_PROCESS                                                  | 14  | 2.45E-02 |
| GO_REGULATION_OF_VIRAL_TRANSCRIPTION                                                     | 54  | 2.46E-02 |
| GO_REGULATION_OF_INTRACELLULAR_PROTEIN_TRANSPORT                                         | 319 | 2.47E-02 |
| PID_RAC1_PATHWAY                                                                         | 52  | 2.48E-02 |
| KEGG_PENTOSE_AND_GLUCURONATE_INTERCONVERSIONS                                            | 9   | 2.48E-02 |
| GO_WW_DOMAIN_BINDING                                                                     | 23  | 2.48E-02 |
| GO_REGULATION_OF_TYPE_2_IMMUNE_RESPONSE                                                  | 22  | 2.49E-02 |
| GO_MEMBRANE_RAFT_ORGANIZATION                                                            | 13  | 2.49E-02 |
| GO_CERAMIDE_CATABOLIC_PROCESS                                                            | 9   | 2.50E-02 |
| BIOCARTA_MAPK_PATHWAY                                                                    | 85  | 2.50E-02 |
| GO_TUMOR_NECROSIS_FACTOR_RECEPTOR_BINDING                                                | 28  | 2.51E-02 |
| REACTOME_INNATE_IMMUNE_SYSTEM                                                            | 203 | 2.51E-02 |
| GO_DEFINITIVE_HEMOPOIESIS                                                                | 16  | 2.51E-02 |
| REACTOME_PLATELET_ACTIVATION_SIGNALING_AND_AGGREGATION                                   | 171 | 2.51E-02 |
| GO_POSITIVE_REGULATION_OF_IMMUNE_EFFECTOR_PROCESS                                        | 137 | 2.51E-02 |
| GO_PROTEIN_IMPORT_INTO_NUCLEUS_TRANSLOCATION                                             | 23  | 2.52E-02 |
| GO_CELL_CELL_RECOGNITION                                                                 | 36  | 2.52E-02 |

|                                                                                      |     |          |
|--------------------------------------------------------------------------------------|-----|----------|
| REACTOME_MRNA_PROCESSING                                                             | 152 | 2.54E-02 |
| GO_POSITIVE_REGULATION_OF_REACTIVE_OXYGEN_SPECIES_METABOLIC_PROCESS                  | 71  | 2.55E-02 |
| GO_RESPONSE_TO_ALCOHOL                                                               | 255 | 2.55E-02 |
| REACTOME_DCC_MEDIATED_ATTRACTIVE_SIGNALING                                           | 12  | 2.55E-02 |
| GO_REGULATION_OF_ESTABLISHMENT_OF_PROTEIN_LOCALIZATION_TO_MITOCHONDRION              | 114 | 2.60E-02 |
| REACTOME_TRAF6_MEDIATED_INDUCION_OF_NFKB_AND_MAP_KINASES_UPON_TLR7_8_OR_9_ACTIVATION | 72  | 2.60E-02 |
| GO_SMALL_GTPASE_MEDIATED_SIGNAL_TRANSDUCTION                                         | 305 | 2.61E-02 |
| GO_MULTI_MULTICELLULAR_ORGANISM_PROCESS                                              | 141 | 2.62E-02 |
| KEGG_CYTOSOLIC_DNA_SENSING_PATHWAY                                                   | 39  | 2.65E-02 |
| GO_REGULATION_OF_REACTIVE_OXYGEN_SPECIES_METABOLIC_PROCESS                           | 122 | 2.65E-02 |
| GO_POSITIVE_REGULATION_OF_CELLULAR_COMPONENT_BIOGENESIS                              | 311 | 2.65E-02 |
| KEGG_CITRATE_CYCLE_TCA_CYCLE                                                         | 27  | 2.68E-02 |
| GO_ROUGH_ENDOPLASMIC_RETICULUM                                                       | 53  | 2.69E-02 |
| PID_NCADHERIN_PATHWAY                                                                | 29  | 2.69E-02 |
| GO_NEGATIVE_REGULATION_OF_MAPK_CASCADE                                               | 120 | 2.70E-02 |
| GO_REGULATION_OF_PROTEIN_COMPLEX_ASSEMBLY                                            | 317 | 2.70E-02 |
| REACTOME_EARLY_PHASE_OF_HIV_LIFE_CYCLE                                               | 14  | 2.70E-02 |
| REACTOME_MITOCHONDRIAL_FATTY_ACID_BETA_OXIDATION                                     | 13  | 2.70E-02 |
| GO_REGULATION_OF_MONOCYTE_CHEMOTAXIS                                                 | 15  | 2.75E-02 |
| GO_CELLULAR_METABOLIC_COMPOUND_SALVAGE                                               | 33  | 2.76E-02 |
| GO_POSITIVE_REGULATION_OF_PHAGOCYTOSIS                                               | 39  | 2.77E-02 |
| GO_REGULATION_OF_SECRETION                                                           | 481 | 2.78E-02 |
| GO_GANGLIOSIDE_METABOLIC_PROCESS                                                     | 19  | 2.81E-02 |
| GO_MATURATION_OF_SSU_RRNA                                                            | 41  | 2.81E-02 |
| GO_NEGATIVE_REGULATION_OF_CALCIIUM_MEDIATED_SIGNALING                                | 15  | 2.83E-02 |
| GO_DNA_DIRECTED_RNA_POLYMERASE_II_CORE_COMPLEX                                       | 16  | 2.83E-02 |
| BIOCARTA_EPHA4_PATHWAY                                                               | 10  | 2.84E-02 |
| BIOCARTA_ACTINY_PATHWAY                                                              | 19  | 2.84E-02 |
| GO_CELLULAR_MONOVALENT_INORGANIC_CATION_HOMEOSTASIS                                  | 71  | 2.84E-02 |
| GO_TOLL_LIKE_RECEPTOR_SIGNALING_PATHWAY                                              | 80  | 2.85E-02 |
| GO_NEGATIVE_REGULATION_OF_PHOSPHORUS_METABOLIC_PROCESS                               | 416 | 2.85E-02 |
| GO_XENOPHAGY                                                                         | 77  | 2.89E-02 |
| NABA_CORE_MATRISOME                                                                  | 139 | 2.90E-02 |
| GO_REGULATION_OF_MESONEPHROS_DEVELOPMENT                                             | 12  | 2.93E-02 |
| GO_REGULATION_OF_INTERLEUKIN_8_PRODUCTION                                            | 51  | 2.93E-02 |
| KEGG_DRUG_METABOLISM_CYTOCHROME_P450                                                 | 22  | 2.93E-02 |
| GO_INTRAMOLECULAR_OXIDOREDUCTASE_ACTIVITY_TRANSPOSING_S_S_BONDS                      | 20  | 2.96E-02 |
| GO_RESPONSE_TO_KETONE                                                                | 138 | 2.97E-02 |
| GO_CLATHRIN_MEDIATED_ENDOCYTOSIS                                                     | 32  | 2.98E-02 |
| GO_ACTIN_FILAMENT_ORGANIZATION                                                       | 144 | 2.99E-02 |
| GO_DEOXYRIBONUCLEOSIDE_TRIPHOSPHATE_METABOLIC_PROCESS                                | 16  | 3.00E-02 |
| GO_PEPTIDASE_ACTIVITY                                                                | 431 | 3.00E-02 |
| GO_POSITIVE_REGULATION_OF_ERBB_SIGNALING_PATHWAY                                     | 28  | 3.00E-02 |
| PID_GMCSF_PATHWAY                                                                    | 35  | 3.02E-02 |
| GO_POSITIVE_REGULATION_OF_I_KAPPAB_KINASE_NF_KAPPAB_SIGNALING                        | 164 | 3.09E-02 |
| GO_REGULATION_OF_EXTRINSIC_APOPTOTIC_SIGNALING_PATHWAY                               | 122 | 3.12E-02 |
| GO_NEGATIVE_REGULATION_OF_PROTEIN_SERINE_THREONINE_KINASE_ACTIVITY                   | 108 | 3.12E-02 |
| GO_CELL_KILLING                                                                      | 38  | 3.12E-02 |
| GO_ANCHORED_COMPONENT_OF_MEMBRANE                                                    | 80  | 3.12E-02 |
| GO_MULTIVESICULAR_BODY                                                               | 29  | 3.12E-02 |
| GO_NUCLEOTIDE_EXCISION_REPAIR_DNA_DAMAGE_RECOGNITION                                 | 23  | 3.12E-02 |
| GO_RESPONSE_TO_MUSCLE_STRETCH                                                        | 14  | 3.16E-02 |
| GO_PEPTIDASE_REGULATOR_ACTIVITY                                                      | 123 | 3.17E-02 |
| GO_NUCLEOID                                                                          | 38  | 3.19E-02 |
| HALLMARK_KRAS_SIGNALING_UP                                                           | 155 | 3.23E-02 |
| GO_NEGATIVE_REGULATION_OF_VIRAL_ENTRY_INTO_HOST_CELL                                 | 14  | 3.24E-02 |
| GO_RESPONSE_TO_METAL_ION                                                             | 238 | 3.25E-02 |
| GO_ESCRT_III_COMPLEX                                                                 | 10  | 3.27E-02 |
| GO_TRANSFERASE_ACTIVITY_TRANSFERRING_HEXOSYL_GROUPS                                  | 139 | 3.33E-02 |
| BIOCARTA_FMLP_PATHWAY                                                                | 32  | 3.35E-02 |
| REACTOME_LYSOSOME_VESICLE_BIOGENESIS                                                 | 22  | 3.35E-02 |
| GO_SMALL_NUCLEOLAR_RIBONUCLEOPROTEIN_COMPLEX                                         | 19  | 3.35E-02 |
| GO_PROTEIN_PHOSPHORYLATED_AMINO_ACID_BINDING                                         | 21  | 3.35E-02 |
| GO_POSITIVE_REGULATION_OF_ALPHA_BETA_T_CELL_DIFFERENTIATION                          | 34  | 3.35E-02 |
| PID_VEGFR1_2_PATHWAY                                                                 | 65  | 3.35E-02 |
| BIOCARTA_IL2_PATHWAY                                                                 | 21  | 3.36E-02 |
| BIOCARTA_CDMAC_PATHWAY                                                               | 16  | 3.36E-02 |
| BIOCARTA_CDC42RAC_PATHWAY                                                            | 16  | 3.38E-02 |

|                                                                                                         |     |          |
|---------------------------------------------------------------------------------------------------------|-----|----------|
| BIOCARTA_MAL_PATHWAY                                                                                    | 18  | 3.40E-02 |
| REACTOME_INTEGRATION_OF_PROVIRUS                                                                        | 9   | 3.41E-02 |
| BIOCARTA_INSULIN_PATHWAY                                                                                | 21  | 3.41E-02 |
| GO_RNA_SPLICING_VIA_TRANSESTERIFICATION_REACTIONS                                                       | 251 | 3.42E-02 |
| PID_INTEGRIN_A9B1_PATHWAY                                                                               | 19  | 3.42E-02 |
| GO_LIPID_OXIDATION                                                                                      | 63  | 3.44E-02 |
| GO_IMMUNE_SYSTEM_DEVELOPMENT                                                                            | 488 | 3.44E-02 |
| GO_RESPONSE_TO_LITHIUM_ION                                                                              | 17  | 3.45E-02 |
| REACTOME_SIGNAL_ATTENUATION                                                                             | 11  | 3.48E-02 |
| GO_NEGATIVE_REGULATION_OF_INTERLEUKIN_17_PRODUCTION                                                     | 9   | 3.48E-02 |
| GO_PROTEIN_TRANSMEMBRANE_TRANSPORT                                                                      | 47  | 3.49E-02 |
| REACTOME_THE_ROLE_OF_NEF_IN_HIV1_REPLICATION_AND_DISEASE_PATHOGENESIS                                   | 28  | 3.49E-02 |
| GO_REGULATION_OF_COAGULATION                                                                            | 58  | 3.49E-02 |
| GO_EMBRYO_IMPLANTATION                                                                                  | 28  | 3.53E-02 |
| GO_SPLICEOSOMAL_COMPLEX                                                                                 | 163 | 3.57E-02 |
| GO_RESPONSE_TO_ORGANOPHOSPHORUS                                                                         | 101 | 3.59E-02 |
| GO_CCR_CHEMOKINE_RECEPTOR_BINDING                                                                       | 21  | 3.59E-02 |
| GO_BLOOD_MICROPARTICLE                                                                                  | 92  | 3.66E-02 |
| GO_PEPTIDYL_ASPARAGINE_MODIFICATION                                                                     | 34  | 3.66E-02 |
| HALLMARK_CHOLESTEROL_HOMEOSTASIS                                                                        | 67  | 3.72E-02 |
| GO_ENZYME_INHIBITOR_ACTIVITY                                                                            | 240 | 3.73E-02 |
| GO_ATPASE_ACTIVITY_COUPLED_TO_MOVEMENT_OF_SUBSTANCES                                                    | 96  | 3.76E-02 |
| GO_MONOVALENT_INORGANIC_CATION_HOMEOSTASIS                                                              | 85  | 3.76E-02 |
| GO_OPSONIN_BINDING                                                                                      | 8   | 3.77E-02 |
| GO_MACROMOLECULE_TRANSMEMBRANE_TRANSPORTER_ACTIVITY                                                     | 19  | 3.79E-02 |
| GO_POSITIVE_REGULATION_OF_INTERFERON_GAMMA_PRODUCTION                                                   | 57  | 3.80E-02 |
| REACTOME_DEVELOPMENTAL_BIOLOGY                                                                          | 286 | 3.80E-02 |
| GO_POSITIVE_REGULATION_OF_ENDOCYTOSIS                                                                   | 89  | 3.82E-02 |
| GO_REGULATION_OF_ALPHA_BETA_T_CELL_DIFFERENTIATION                                                      | 41  | 3.82E-02 |
| GO_RESPONSE_TO_STEROID_HORMONE                                                                          | 353 | 3.83E-02 |
| HALLMARK_MYC_TARGETS_V2                                                                                 | 58  | 3.83E-02 |
| REACTOME_SIGNALLING_TO_ERKS                                                                             | 32  | 3.84E-02 |
| GO_ADP_METABOLIC_PROCESS                                                                                | 37  | 3.84E-02 |
| REACTOME_CELL_CYCLE                                                                                     | 374 | 3.87E-02 |
| GO_MEMBRANE_INVAGINATION                                                                                | 40  | 3.87E-02 |
| GO_CELLULAR_DEFENSE_RESPONSE                                                                            | 48  | 3.87E-02 |
| GO_PYRIMIDINE_NUCLEOSIDE_BIOSYNTHETIC_PROCESS                                                           | 26  | 3.88E-02 |
| GO_REGULATION_OF_B_CELL_ACTIVATION                                                                      | 105 | 3.88E-02 |
| PID_PI3KCI_AKT_PATHWAY                                                                                  | 35  | 3.88E-02 |
| GO_FATTY_ACID_CATABOLIC_PROCESS                                                                         | 67  | 3.90E-02 |
| KEGG_FC_GAMMA_R_MEDIATED_PHAGOCYTOSIS                                                                   | 93  | 3.90E-02 |
| BIOCARTA_MET_PATHWAY                                                                                    | 36  | 3.90E-02 |
| GO_POSITIVE_REGULATION_OF_B_CELL_ACTIVATION                                                             | 72  | 3.92E-02 |
| GO_NOTCH_SIGNALING_PATHWAY                                                                              | 82  | 3.93E-02 |
| BIOCARTA_BIOPEPTIDES_PATHWAY                                                                            | 36  | 3.94E-02 |
| GO_ESCRT_COMPLEX                                                                                        | 23  | 3.94E-02 |
| REACTOME_P75NTR_SIGNALS_VIA_NFKB                                                                        | 12  | 3.95E-02 |
| GO_CHEMOKINE_RECEPTOR_BINDING                                                                           | 39  | 3.95E-02 |
| GO_INFLAMMASOME_COMPLEX                                                                                 | 11  | 3.97E-02 |
| GO_SOMATIC_STEM_CELL_POPULATION_MAINTENANCE                                                             | 47  | 3.97E-02 |
| GO_NUCLEOBASE_CONTAINING_SMALL_MOLECULE_INTERCONVERSION                                                 | 20  | 3.98E-02 |
| GO_CELL_BODY                                                                                            | 343 | 3.99E-02 |
| GO_TRICARBOXYLIC_ACID_METABOLIC_PROCESS                                                                 | 32  | 3.99E-02 |
| GO_ENDOPEPTIDASE_ACTIVITY                                                                               | 280 | 3.99E-02 |
| GO_REGULATION_OF_CHEMOTAXIS                                                                             | 133 | 4.00E-02 |
| GO_RETROGRADE_VESICLE_MEDIATED_TRANSPORT_GOLGI_TO_ER                                                    | 69  | 4.00E-02 |
| GO_NEGATIVE_REGULATION_OF_PEPTIDASE_ACTIVITY                                                            | 149 | 4.00E-02 |
| GO_ENDOPLASMIC_RETICULUM_GOLGI_INTERMEDIATE_COMPARTMENT                                                 | 90  | 4.01E-02 |
| GO_POSITIVE_REGULATION_OF_INTERLEUKIN_6_SECRETION                                                       | 11  | 4.01E-02 |
| REACTOME_TOLL_RECEPTOR_CASCADES                                                                         | 111 | 4.01E-02 |
| GO_CELLULAR_RESPONSE_TO_LIPOPROTEIN_PARTICLE_STIMULUS                                                   | 11  | 4.05E-02 |
| GO_GABAERGIC_NEURON_DIFFERENTIATION                                                                     | 6   | 4.05E-02 |
| REACTOME_CHEMOKINE_RECEPTORS_BIND_CHEMOKINES                                                            | 40  | 4.05E-02 |
| BIOCARTA_SPRY_PATHWAY                                                                                   | 15  | 4.05E-02 |
| GO_CELLULAR_ALDEHYDE_METABOLIC_PROCESS                                                                  | 67  | 4.05E-02 |
| GO_LIPID_CATABOLIC_PROCESS                                                                              | 172 | 4.07E-02 |
| REACTOME_NEF_MEDIATES_DOWN_MODULATION_OF_CELL_SURFACE_RECEPTORS_BY_RECRUITING_THEM_TO_CLATHRIN_ADAPTERS | 21  | 4.08E-02 |
| GO_MULTIVESICULAR_BODY_ORGANIZATION                                                                     | 29  | 4.11E-02 |



|                                                                                                                          |     |          |
|--------------------------------------------------------------------------------------------------------------------------|-----|----------|
| REACTOME_CELL_JUNCTION_ORGANIZATION                                                                                      | 43  | 4.11E-02 |
| GO_NEGATIVE_REGULATION_OF_NEURON_DEATH                                                                                   | 129 | 4.11E-02 |
| GO_CELL_CELL_ADHESION                                                                                                    | 400 | 4.14E-02 |
| GO_COMPLEMENT_BINDING                                                                                                    | 15  | 4.23E-02 |
| GO_ADAPTIVE_IMMUNE_RESPONSE_BASED_ON_SOMATIC_RECOMBINATION_OF_IMMUNE_RECEPTORS_BUILT_FROM_IMMUNOGLOBULIN_SUPERFAMILY_DOM | 126 | 4.23E-02 |
| REACTOME_SHC1_EVENTS_IN_ERBB4_SIGNALING                                                                                  | 17  | 4.23E-02 |
| GO_NUCLEOSOMAL_DNA_BINDING                                                                                               | 28  | 4.24E-02 |
| GO_FIBRIL_ORGANIZATION                                                                                                   | 15  | 4.24E-02 |
| GO_EXOPEPTIDASE_ACTIVITY                                                                                                 | 75  | 4.24E-02 |
| GO_MEMBRANE_LIPID_METABOLIC_PROCESS                                                                                      | 150 | 4.26E-02 |
| GO_CELLULAR_RESPONSE_TO_REACTIVE_OXYGEN_SPECIES                                                                          | 92  | 4.26E-02 |
| GO_POSITIVE_REGULATION_OF_SPROUTING_ANGIOGENESIS                                                                         | 11  | 4.27E-02 |
| BIOCARTA_ETC_PATHWAY                                                                                                     | 11  | 4.28E-02 |
| GO_PHAGOCYTOSIS_ENGULFMENT                                                                                               | 30  | 4.29E-02 |
| BIOCARTA_FEEDER_PATHWAY                                                                                                  | 7   | 4.29E-02 |
| GO_HYDROGEN_PEROXIDE_METABOLIC_PROCESS                                                                                   | 21  | 4.29E-02 |
| KEGG_CYTOKINE_CYTOKINE_RECEPTOR_INTERACTION                                                                              | 178 | 4.32E-02 |
| REACTOME_ACTIVATED_TLR4_SIGNALING                                                                                        | 88  | 4.34E-02 |
| GO_PYRIMIDINE_CONTAINING_COMPOUND_BIOSYNTHETIC_PROCESS                                                                   | 35  | 4.38E-02 |
| GO_REGULATION_OF_INTERLEUKIN_1_BETA_PRODUCTION                                                                           | 43  | 4.38E-02 |
| SA_MMP_CYTOKINE_CONNECTION                                                                                               | 15  | 4.39E-02 |
| GO_EPHRIN_RECEPTOR_BINDING                                                                                               | 19  | 4.40E-02 |
| GO_POSITIVE_REGULATION_OF_MESENCHYMAL_CELL_PROLIFERATION                                                                 | 16  | 4.40E-02 |
| REACTOME_SYNTHESIS_OF_SUBSTRATES_IN_N_GLYCAN_BIOSYTHESIS                                                                 | 13  | 4.41E-02 |
| GO_ORGANOPHOSPHATE_BIOSYNTHETIC_PROCESS                                                                                  | 373 | 4.43E-02 |
| KEGG_PROPANOATE_METABOLISM                                                                                               | 30  | 4.44E-02 |
| GO_NEGATIVE_REGULATION_OF_NOTCH_SIGNALING_PATHWAY                                                                        | 18  | 4.44E-02 |
| GO_REGULATION_OF_NEURON_DEATH                                                                                            | 197 | 4.47E-02 |
| PID_ENDOTHELIN_PATHWAY                                                                                                   | 53  | 4.48E-02 |
| GO_RESPONSE_TO_CARBOHYDRATE                                                                                              | 119 | 4.49E-02 |
| GO_ANGIOGENESIS_INVOLVED_IN_WOUND_HEALING                                                                                | 9   | 4.51E-02 |
| GO_CIS_TRANS_ISOMERASE_ACTIVITY                                                                                          | 36  | 4.52E-02 |
| GO_INSULIN_LIKE_GROWTH_FACTOR_RECEPTOR_BINDING                                                                           | 10  | 4.53E-02 |
| KEGG_REGULATION_OF_ACTIN_CYTOSKELETON                                                                                    | 168 | 4.58E-02 |
| GO_NEGATIVE_REGULATION_OF_PROTEOLYSIS                                                                                    | 219 | 4.59E-02 |
| GO_CELLULAR_RESPONSE_TO_KETONE                                                                                           | 60  | 4.60E-02 |
| HALLMARK_XENOBIOTIC_METABOLISM                                                                                           | 159 | 4.71E-02 |
| GO_NEGATIVE_REGULATION_OF_REACTIVE_OXYGEN_SPECIES_BIOSYNTHETIC_PROCESS                                                   | 9   | 4.75E-02 |
| GO_PROTEOGLYCAN_BIOSYNTHETIC_PROCESS                                                                                     | 38  | 4.75E-02 |
| REACTOME_SHC_RELATED_EVENTS                                                                                              | 15  | 4.78E-02 |
| REACTOME_AXON_GUIDANCE                                                                                                   | 183 | 4.79E-02 |
| GO_DEFENSE_RESPONSE_TO_VIRUS                                                                                             | 130 | 4.83E-02 |
| GO_RESPONSE_TO_HEAT                                                                                                      | 66  | 4.84E-02 |
| GO_RESPONSE_TO_THYROID_HORMONE                                                                                           | 18  | 4.84E-02 |
| PID_SHP2_PATHWAY                                                                                                         | 47  | 4.85E-02 |
| PID_NFAT_3PATHWAY                                                                                                        | 52  | 4.90E-02 |
| REACTOME_PLATELET_SENSITIZATION_BY_LDL                                                                                   | 15  | 4.91E-02 |
| HALLMARK_PI3K_AKT_MTOR_SIGNALING                                                                                         | 95  | 4.94E-02 |
| REACTOME_HIV_LIFE_CYCLE                                                                                                  | 111 | 4.97E-02 |
| REACTOME_SIGNALING_BY_ERBB2                                                                                              | 87  | 4.98E-02 |
| REACTOME_PYRIMIDINE_METABOLISM                                                                                           | 20  | 4.98E-02 |
| PID_CERAMIDE_PATHWAY                                                                                                     | 46  | 4.99E-02 |

**Table S3. GSEA list of differentially down-regulated processes (FDR < 0.05) in monocytes of CF subjects after treatment with ivacaftor for 7 days.**

| <b>Gene Set Name</b>                   | <b>Number of Genes</b> | <b>FDR</b> |
|----------------------------------------|------------------------|------------|
| REACTOME_GENERIC_TRANSCRIPTION_PATHWAY | 305                    | 0          |
| GO_CHROMATIN_MODIFICATION              | 475                    | 1.43E-02   |
| GO_CENTRIOLE                           | 92                     | 4.76E-02   |

**Table S4. Functional enrichment analysis of DEGs with increased expression in responders vs. non-responders in the GOAL PBMC transcriptomic analysis (Sun, et al).**

| Gene Ontology ID | Description                                         | Enrichment Ratio | P-value  | FDR      |
|------------------|-----------------------------------------------------|------------------|----------|----------|
| GO:0045055       | regulated exocytosis                                | 6.081            | 3.31E-08 | 3.01E-04 |
| GO:0006887       | exocytosis                                          | 5.326            | 1.71E-07 | 5.78E-04 |
| GO:0016192       | vesicle-mediated transport                          | 3.503            | 1.91E-07 | 5.78E-04 |
| GO:0032940       | secretion by cell                                   | 3.928            | 4.65E-07 | 1.06E-03 |
| GO:0043312       | neutrophil degranulation                            | 7.056            | 1.11E-06 | 1.43E-03 |
| GO:0002283       | neutrophil activation involved in immune response   | 7.013            | 1.18E-06 | 1.43E-03 |
| GO:0042119       | neutrophil activation                               | 6.885            | 1.39E-06 | 1.43E-03 |
| GO:0002446       | neutrophil mediated immunity                        | 6.857            | 1.44E-06 | 1.43E-03 |
| GO:0036230       | granulocyte activation                              | 6.802            | 1.55E-06 | 1.43E-03 |
| GO:0046903       | secretion                                           | 3.603            | 1.57E-06 | 1.43E-03 |
| GO:0098657       | import into cell                                    | 5.153            | 2.22E-06 | 1.83E-03 |
| GO:0043299       | leukocyte degranulation                             | 6.430            | 2.57E-06 | 1.95E-03 |
| GO:0002275       | myeloid cell activation involved in immune response | 6.310            | 3.04E-06 | 2.13E-03 |
| GO:0002444       | myeloid leukocyte mediated immunity                 | 6.207            | 3.52E-06 | 2.29E-03 |
| GO:0002274       | myeloid leukocyte activation                        | 5.365            | 1.27E-05 | 7.69E-03 |
| GO:0006897       | endocytosis                                         | 5.039            | 2.18E-05 | 1.24E-02 |
| GO:0002366       | leukocyte activation involved in immune response    | 4.908            | 2.73E-05 | 1.45E-02 |
| GO:0002263       | cell activation involved in immune response         | 4.880            | 2.87E-05 | 1.45E-02 |
| GO:0002443       | leukocyte mediated immunity                         | 4.475            | 5.98E-05 | 2.86E-02 |
| GO:0002252       | immune effector process                             | 3.577            | 8.63E-05 | 3.92E-02 |
